# Supplementary material for: Mutations in DNA damage response pathways as a potential biomarker for immune checkpoint blockade efficacy: evidence from a seven-cancer immunotherapy cohort
Source: Aging (Albany NY). 2021 Nov 8;13(21):24136–54. doi: 10.18632/aging.203670 (PMC8610133; doi:10.18632/aging.203670)
Supplement: Supplementary Table 1 [file aging-13-203670-s002.xlsx]

## Sheet: Supplementary Table 1
Supplementary Table 1. Clinical characteristics of included 1363 patients treated with immunotherapy.
Patient_ID	Age	Gender	Cancer_subtype	Drug_type	TMB	Overall_survival (months)	Survival_status (0: live; 1: death)
P-0014148	44	Female	Melanoma	CTLA4	47.22	80	0
P-0000686	78	Male	Melanoma	CTLA4	181.78	80	0
P-0006904	52	Male	Renal Cell Carcinoma	PD-1/PDL-1	1.97	78	0
P-0000646	79	Male	Melanoma	CTLA4	42.38	77	0
P-0007736	33	Female	Melanoma	CTLA4	11.81	71	0
P-0001174	77	Female	Melanoma	CTLA4	1.12	70	0
P-0006952	49	Male	Melanoma	CTLA4	18.69	69	0
P-0005222	53	Male	Melanoma	CTLA4	15.74	69	0
P-0006762	64	Female	Renal Cell Carcinoma	PD-1/PDL-1	3.94	68	1
P-0016181	77	Female	Colorectal Cancer	PD-1/PDL-1	66.7063	67	0
P-0011297	46	Male	Melanoma	CTLA4	4.92	66	0
P-0003872	56	Female	Melanoma	CTLA4	19.68	65	0
P-0006973	52	Male	Melanoma	PD-1/PDL-1	11.81	61	0
P-0013343	57	Female	Melanoma	CTLA4	19.68	60	1
P-0002993	78	Male	Melanoma	CTLA4	4.46	59	1
P-0005593	67	Male	Renal Cell Carcinoma	PD-1/PDL-1	0.98	59	0
P-0006476	43	Male	Melanoma	CTLA4	12.79	58	1
P-0015791	65	Male	Melanoma	PD-1/PDL-1	7.9	58	1
P-0000604	59	Male	Non-Small Cell Lung Cancer	Combo	4.46	57	0
P-0000082	61	Male	Non-Small Cell Lung Cancer	PD-1/PDL-1	1.12	57	0
P-0000894	80	Male	Non-Small Cell Lung Cancer	PD-1/PDL-1	6.69	57	0
P-0009497	71	Male	Melanoma	CTLA4	2.95	56	0
P-0009655	71	Female	Non-Small Cell Lung Cancer	Combo	2.95	56	0
P-0005328	78	Male	Renal Cell Carcinoma	PD-1/PDL-1	5.9	56	0
P-0013035	47	Female	Melanoma	CTLA4	3.94	55	0
P-0005510	69	Female	Non-Small Cell Lung Cancer	PD-1/PDL-1	5.9	55	0
P-0021474	68	Male	Head and Neck Cancer	PD-1/PDL-1	2.63314	51	0
P-0003743	71	Male	Melanoma	Combo	8.85	51	0
P-0005048	70	Female	Non-Small Cell Lung Cancer	Combo	3.94	51	0
P-0006488	73	Female	Melanoma	Combo	6.89	50	0
P-0006121	81	Female	Melanoma	CTLA4	2.95	50	0
P-0005271	64	Male	Renal Cell Carcinoma	PD-1/PDL-1	7.87	50	1
P-0005383	41	Male	Melanoma	PD-1/PDL-1	21.64	49	0
P-0003868	51	Male	Melanoma	Combo	13.77	49	1
P-0004376	80	Male	Renal Cell Carcinoma	PD-1/PDL-1	6.89	49	0
P-0000968	70	Male	Melanoma	Combo	3.35	48	0
P-0007633	79	Male	Non-Small Cell Lung Cancer	Combo	2.95	48	0
P-0005808	41	Male	Renal Cell Carcinoma	PD-1/PDL-1	4.92	48	0
P-0005719	71	Male	Renal Cell Carcinoma	PD-1/PDL-1	3.94	48	0
P-0004527	68	Female	Melanoma	CTLA4	5.9	47	1
P-0006541	81	Male	Melanoma	PD-1/PDL-1	33.45	47	1
P-0005981	61	Male	Non-Small Cell Lung Cancer	PD-1/PDL-1	9.84	47	0
P-0004996	57	Male	Non-Small Cell Lung Cancer	Combo	2.95	46	1
P-0002806	82	Male	Non-Small Cell Lung Cancer	PD-1/PDL-1	4.46	46	0
P-0002615	57	Female	Renal Cell Carcinoma	Combo	4.46	46	0
P-0013728	62	Male	Renal Cell Carcinoma	Combo	1.97	46	0
P-0009148	47	Male	Melanoma	CTLA4	14.76	45	0
P-0001081	52	Female	Melanoma	CTLA4	45.72	45	0
P-0003562	62	Male	Non-Small Cell Lung Cancer	PD-1/PDL-1	36.4	45	0
P-0003568	55	Male	Renal Cell Carcinoma	PD-1/PDL-1	3.94	45	0
P-0012267	72	Female	Renal Cell Carcinoma	Combo	3.94	45	0
P-0008963	46	Male	Melanoma	CTLA4	8.85	44	0
P-0004871	63	Female	Melanoma	CTLA4	7.87	44	0
P-0005733	66	Female	Melanoma	CTLA4	17.71	44	1
P-0005354	60	Male	Renal Cell Carcinoma	PD-1/PDL-1	5.9	44	1
P-0006639	63	Male	Renal Cell Carcinoma	PD-1/PDL-1	2.95	44	0
P-0004050	54	Male	Bladder Cancer	PD-1/PDL-1	12.2677	43	0
P-0000071	66	Male	Bladder Cancer	PD-1/PDL-1	11.1524	43	0
P-0013025	60	Male	Melanoma	CTLA4	13.77	43	0
P-0001560	65	Male	Melanoma	CTLA4	25.65	43	0
P-0002559	39	Female	Non-Small Cell Lung Cancer	PD-1/PDL-1	1.12	43	0
P-0006510	69	Female	Renal Cell Carcinoma	PD-1/PDL-1	17.71	43	0
P-0000063	62	Male	Bladder Cancer	PD-1/PDL-1	16.7287	42	0
P-0004253	59	Male	Melanoma	CTLA4	9.84	42	1
P-0000596	71	Male	Melanoma	CTLA4	42.38	42	0
P-0001361	73	Male	Melanoma	CTLA4	34.57	42	1
P-0001093	65	Male	Non-Small Cell Lung Cancer	Combo	12.27	42	0
P-0000731	73	Female	Non-Small Cell Lung Cancer	PD-1/PDL-1	6.69	42	0
P-0004507	62	Male	Renal Cell Carcinoma	PD-1/PDL-1	3.94	42	0
P-0006239	72	Male	Renal Cell Carcinoma	PD-1/PDL-1	3.94	42	0
P-0002668	74	Male	Bladder Cancer	PD-1/PDL-1	11.1524	41	0
P-0004048	56	Male	Melanoma	PD-1/PDL-1	1.97	41	1
P-0003560	67	Male	Melanoma	CTLA4	46.24	41	0
P-0002490	72	Male	Melanoma	Combo	126.02	41	1
P-0002715	67	Male	Bladder Cancer	PD-1/PDL-1	16.7287	40	0
P-0001603	61	Male	Melanoma	CTLA4	22.3	40	0
P-0005144	64	Male	Melanoma	CTLA4	6.89	40	1
P-0001710	64	Male	Melanoma	CTLA4	17.84	40	0
P-0001756	74	Male	Melanoma	CTLA4	45.72	40	0
P-0001385	51	Female	Non-Small Cell Lung Cancer	Combo	14.5	40	0
P-0003869	67	Female	Non-Small Cell Lung Cancer	PD-1/PDL-1	55.09	40	0
P-0002311	59	Male	Bladder Cancer	Combo	18.9591	39	0
P-0000423	61	Male	Bladder Cancer	PD-1/PDL-1	22.3049	39	0
P-0003524	62	Male	Bladder Cancer	PD-1/PDL-1	42.3029	39	0
P-0002568	84	Male	Bladder Cancer	PD-1/PDL-1	2.23049	39	0
P-0002049	33	Female	Colorectal Cancer	PD-1/PDL-1	54.6469	39	0
P-0002392	53	Male	Melanoma	CTLA4	35.69	39	0
P-0009105	66	Female	Melanoma	CTLA4	33.45	39	0
P-0005228	76	Male	Melanoma	PD-1/PDL-1	92.48	39	0
P-0008080	77	Male	Melanoma	CTLA4	48.21	39	0
P-0006550	47	Male	Renal Cell Carcinoma	PD-1/PDL-1	1.97	39	0
P-0004813	61	Male	Renal Cell Carcinoma	PD-1/PDL-1	3.94	39	0
P-0002255	63	Female	Renal Cell Carcinoma	PD-1/PDL-1	3.35	39	0
P-0005958	66	Male	Renal Cell Carcinoma	Combo	3.94	39	0
P-0004413	73	Female	Renal Cell Carcinoma	PD-1/PDL-1	1.97	39	0
P-0015923	82	Male	Bladder Cancer	PD-1/PDL-1	32.4755	38	0
P-0004518	67	Female	Melanoma	CTLA4	25.58	38	0
P-0003368	59	Female	Non-Small Cell Lung Cancer	Combo	8.85	38	0
P-0002820	50	Female	Renal Cell Carcinoma	PD-1/PDL-1	4.46	38	0
P-0004397	51	Male	Renal Cell Carcinoma	PD-1/PDL-1	3.94	38	0
P-0006334	53	Female	Renal Cell Carcinoma	PD-1/PDL-1	2.95	38	0
P-0004170	59	Male	Renal Cell Carcinoma	Combo	2.95	38	0
P-0005954	59	Male	Renal Cell Carcinoma	PD-1/PDL-1	2.95	38	0
P-0003225	82	Female	Melanoma	Combo	8.85	37	0
P-0002637	54	Male	Non-Small Cell Lung Cancer	Combo	18.96	37	0
P-0005053	57	Male	Melanoma	Combo	12.79	36	0
P-0003700	73	Male	Melanoma	Combo	3.94	36	0
P-0003584	61	Female	Non-Small Cell Lung Cancer	PD-1/PDL-1	10.82	36	1
P-0006653	62	Female	Renal Cell Carcinoma	PD-1/PDL-1	4.92	36	1
P-0005458	63	Female	Renal Cell Carcinoma	PD-1/PDL-1	3.94	36	0
P-0000268	49	Male	Bladder Cancer	PD-1/PDL-1	6.69146	35	0
P-0014421	83	Male	Bladder Cancer	Combo	7.02172	35	0
P-0000768	58	Male	Head and Neck Cancer	PD-1/PDL-1	4.46097	35	1
P-0000958	16	Female	Melanoma	CTLA4	2.23	35	0
P-0003621	49	Female	Melanoma	Combo	2.95	35	0
P-0003757	65	Male	Melanoma	Combo	9.84	35	0
P-0004142	67	Female	Melanoma	CTLA4	23.61	35	0
P-0004349	72	Female	Melanoma	PD-1/PDL-1	6.89	35	0
P-0004437	82	Female	Melanoma	Combo	15.74	35	0
P-0009319	64	Male	Non-Small Cell Lung Cancer	Combo	1.97	35	0
P-0003721	57	Female	Renal Cell Carcinoma	Combo	2.95	35	0
P-0004983	55	Male	Bladder Cancer	Combo	1.96758	34	0
P-0003698	63	Male	Bladder Cancer	Combo	7.87031	34	0
P-0004362	38	Male	Colorectal Cancer	PD-1/PDL-1	68.8652	34	1
P-0001598	76	Male	Head and Neck Cancer	PD-1/PDL-1	11.1524	34	0
P-0003728	56	Male	Melanoma	Combo	49.19	34	0
P-0010311	60	Male	Renal Cell Carcinoma	Combo	7.87	34	0
P-0008399	64	Female	Renal Cell Carcinoma	Combo	4.92	34	1
P-0003555	32	Male	Bladder Cancer	PD-1/PDL-1	71.8166	33	0
P-0004857	35	Male	Glioma	PD-1/PDL-1	4.92	33	0
P-0005141	56	Male	Glioma	PD-1/PDL-1	1.97	33	0
P-0013278	79	Male	Head and Neck Cancer	PD-1/PDL-1	7.87031	33	1
P-0003620	54	Female	Melanoma	CTLA4	20.66	33	0
P-0003372	56	Female	Melanoma	Combo	2.95	33	0
P-0004933	56	Male	Melanoma	Combo	14.76	33	0
P-0000895	67	Male	Melanoma	Combo	7.81	33	1
P-0013854	78	Male	Melanoma	Combo	5.9	33	1
P-0002028	65	Female	Non-Small Cell Lung Cancer	PD-1/PDL-1	6.69	33	0
P-0005187	44	Female	Renal Cell Carcinoma	Combo	6.89	33	0
P-0008137	54	Male	Renal Cell Carcinoma	Combo	2.95	33	0
P-0006546	29	Male	Glioma	PD-1/PDL-1	6.89	32	0
P-0007620	54	Male	Head and Neck Cancer	PD-1/PDL-1	5.90273	32	0
P-0004203	23	Male	Melanoma	Combo	9.84	32	0
P-0004661	33	Male	Melanoma	Combo	7.87	32	0
P-0004348	50	Female	Melanoma	Combo	24.59	32	0
P-0002380	51	Female	Melanoma	Combo	11.15	32	0
P-0004952	54	Male	Melanoma	Combo	36.4	32	0
P-0005201	55	Male	Melanoma	Combo	8.85	32	0
P-0002706	71	Female	Melanoma	CTLA4	18.96	32	1
P-0005421	72	Male	Melanoma	PD-1/PDL-1	15.74	32	0
P-0000697	75	Female	Melanoma	Combo	8.92	32	1
P-0005146	78	Female	Melanoma	PD-1/PDL-1	8.85	32	0
P-0007088	45	Female	Non-Small Cell Lung Cancer	PD-1/PDL-1	4.92	32	1
P-0006542	72	Male	Renal Cell Carcinoma	Combo	9.84	32	0
P-0005132	56	Male	Colorectal Cancer	PD-1/PDL-1	6.88652	31	0
P-0000739	79	Male	Colorectal Cancer	PD-1/PDL-1	7.80671	31	1
P-0001731	26	Male	Glioma	PD-1/PDL-1	5.58	31	1
P-0005493	27	Male	Melanoma	Combo	7.87	31	0
P-0002418	30	Female	Melanoma	CTLA4	3.35	31	0
P-0005062	59	Female	Melanoma	Combo	0.98	31	0
P-0009106	68	Female	Melanoma	Combo	12.79	31	0
P-0004214	84	Male	Melanoma	PD-1/PDL-1	35.42	31	1
P-0007879	70	Female	Non-Small Cell Lung Cancer	PD-1/PDL-1	9.84	31	0
P-0007310	46	Female	Renal Cell Carcinoma	Combo	8.85	31	0
P-0009830	25	Male	Colorectal Cancer	PD-1/PDL-1	44.2705	30	0
P-0005151	37	Male	Colorectal Cancer	PD-1/PDL-1	65.9139	30	0
P-0007405	57	Male	Colorectal Cancer	PD-1/PDL-1	6.88652	30	0
P-0010581	75	Male	Colorectal Cancer	PD-1/PDL-1	66.8977	30	0
P-0005604	33	Male	Melanoma	Combo	5.9	30	0
P-0006192	35	Female	Melanoma	Combo	7.87	30	0
P-0001029	56	Male	Melanoma	CTLA4	2.23	30	1
P-0012783	62	Male	Melanoma	Combo	18.69	30	0
P-0003703	64	Female	Melanoma	CTLA4	0.98	30	1
P-0005352	65	Female	Melanoma	Combo	10.82	30	0
P-0006034	74	Male	Melanoma	Combo	45.25	30	0
P-0002917	51	Female	Non-Small Cell Lung Cancer	PD-1/PDL-1	6.69	30	0
P-0004701	53	Female	Non-Small Cell Lung Cancer	PD-1/PDL-1	19.68	30	0
P-0015556	67	Male	Non-Small Cell Lung Cancer	PD-1/PDL-1	4.39	30	0
P-0004588	73	Male	Non-Small Cell Lung Cancer	PD-1/PDL-1	3.94	30	0
P-0006935	48	Male	Renal Cell Carcinoma	PD-1/PDL-1	2.95	30	1
P-0006959	53	Male	Renal Cell Carcinoma	Combo	1.97	30	0
P-0009348	54	Male	Renal Cell Carcinoma	Combo	3.94	30	0
P-0006557	71	Male	Renal Cell Carcinoma	PD-1/PDL-1	8.85	30	0
P-0007410	38	Male	Colorectal Cancer	PD-1/PDL-1	1.96758	29	0
P-0005823	66	Male	Colorectal Cancer	PD-1/PDL-1	89.5248	29	0
P-0005912	56	Male	Glioma	PD-1/PDL-1	3.94	29	1
P-0003360	62	Male	Glioma	Combo	3.94	29	0
P-0010312	62	Male	Head and Neck Cancer	PD-1/PDL-1	0.983789	29	1
P-0007971	71	Male	Head and Neck Cancer	PD-1/PDL-1	5.90273	29	1
P-0006731	52	Female	Melanoma	Combo	15.74	29	0
P-0004832	58	Male	Melanoma	CTLA4	1.97	29	1
P-0006845	64	Male	Melanoma	PD-1/PDL-1	4.92	29	0
P-0005928	68	Male	Melanoma	PD-1/PDL-1	18.69	29	0
P-0006467	73	Male	Melanoma	Combo	2.95	29	0
P-0007293	85	Female	Melanoma	PD-1/PDL-1	5.9	29	0
P-0001171	52	Male	Non-Small Cell Lung Cancer	PD-1/PDL-1	100.37	29	0
P-0008322	67	Male	Non-Small Cell Lung Cancer	PD-1/PDL-1	2.95	29	0
P-0005295	73	Male	Non-Small Cell Lung Cancer	PD-1/PDL-1	3.94	29	0
P-0004752	86	Male	Non-Small Cell Lung Cancer	PD-1/PDL-1	0.98	29	0
P-0008459	53	Male	Renal Cell Carcinoma	Combo	0.98	29	0
P-0007556	55	Male	Renal Cell Carcinoma	Combo	8.85	29	0
P-0005226	56	Male	Renal Cell Carcinoma	PD-1/PDL-1	2.95	29	1
P-0005747	69	Male	Renal Cell Carcinoma	PD-1/PDL-1	2.95	29	0
P-0003131	59	Male	Bladder Cancer	PD-1/PDL-1	7.87031	28	0
P-0005627	69	Male	Bladder Cancer	PD-1/PDL-1	27.5461	28	0
P-0015660	71	Male	Bladder Cancer	Combo	9.65486	28	1
P-0006281	75	Male	Bladder Cancer	Combo	24.5947	28	0
P-0004051	68	Male	Colorectal Cancer	PD-1/PDL-1	68.8652	28	0
P-0003009	52	Female	Head and Neck Cancer	Combo	8.92195	28	1
P-0006826	58	Male	Head and Neck Cancer	PD-1/PDL-1	4.91895	28	1
P-0007238	30	Male	Melanoma	PD-1/PDL-1	2.95	28	0
P-0007142	60	Male	Melanoma	PD-1/PDL-1	4.92	28	0
P-0013845	63	Male	Melanoma	Combo	1.97	28	0
P-0007061	64	Female	Melanoma	Combo	1.97	28	0
P-0010249	66	Male	Melanoma	CTLA4	19.68	28	0
P-0002504	67	Male	Melanoma	CTLA4	37.92	28	1
P-0005118	76	Male	Melanoma	Combo	17.71	28	0
P-0008228	80	Male	Melanoma	PD-1/PDL-1	44.27	28	0
P-0006719	90	Female	Melanoma	PD-1/PDL-1	38.37	28	0
P-0003119	53	Male	Non-Small Cell Lung Cancer	PD-1/PDL-1	12.79	28	0
P-0004020	58	Female	Non-Small Cell Lung Cancer	Combo	4.92	28	1
P-0006343	61	Female	Non-Small Cell Lung Cancer	PD-1/PDL-1	5.9	28	0
P-0000681	67	Female	Non-Small Cell Lung Cancer	PD-1/PDL-1	18.96	28	0
P-0007399	66	Male	Renal Cell Carcinoma	Combo	2.95	28	0
P-0001135	58	Male	Bladder Cancer	PD-1/PDL-1	5.57622	27	1
P-0004137	60	Male	Bladder Cancer	Combo	26.5623	27	0
P-0007421	64	Male	Bladder Cancer	PD-1/PDL-1	1.96758	27	0
P-0021834	64	Male	Colorectal Cancer	PD-1/PDL-1	6.144	27	0
P-0009188	81	Male	Head and Neck Cancer	Combo	6.88652	27	0
P-0005235	61	Male	Melanoma	Combo	0.98	27	1
P-0007810	70	Male	Melanoma	PD-1/PDL-1	43.29	27	0
P-0005159	83	Male	Melanoma	PD-1/PDL-1	102.31	27	1
P-0003738	58	Female	Non-Small Cell Lung Cancer	PD-1/PDL-1	4.92	27	0
P-0010024	81	Male	Non-Small Cell Lung Cancer	PD-1/PDL-1	3.94	27	0
P-0008005	45	Male	Renal Cell Carcinoma	PD-1/PDL-1	3.94	27	0
P-0008053	56	Male	Renal Cell Carcinoma	Combo	2.95	27	0
P-0006503	59	Male	Renal Cell Carcinoma	Combo	4.92	27	1
P-0015644	62	Female	Bladder Cancer	Combo	4.38857	26	0
P-0003881	67	Male	Melanoma	Combo	4.92	26	0
P-0008332	57	Female	Non-Small Cell Lung Cancer	PD-1/PDL-1	3.94	26	0
P-0004442	62	Male	Non-Small Cell Lung Cancer	PD-1/PDL-1	34.43	26	0
P-0009256	76	Female	Non-Small Cell Lung Cancer	PD-1/PDL-1	9.84	26	0
P-0009706	53	Male	Renal Cell Carcinoma	PD-1/PDL-1	22.63	26	0
P-0005913	57	Male	Renal Cell Carcinoma	PD-1/PDL-1	8.85	26	0
P-0009152	51	Male	Bladder Cancer	PD-1/PDL-1	60.9949	25	0
P-0010236	64	Male	Bladder Cancer	Combo	13.773	25	0
P-0005021	68	Male	Bladder Cancer	PD-1/PDL-1	209.547	25	0
P-0005361	54	Female	Glioma	PD-1/PDL-1	3.94	25	0
P-0008328	34	Female	Head and Neck Cancer	PD-1/PDL-1	10.8217	25	1
P-0005791	58	Male	Head and Neck Cancer	PD-1/PDL-1	3.93516	25	0
P-0003401	48	Female	Melanoma	CTLA4	0.98	25	1
P-0010232	52	Male	Melanoma	Combo	14.76	25	0
P-0008728	57	Female	Melanoma	Combo	44.27	25	0
P-0008942	68	Male	Melanoma	Combo	35.42	25	0
P-0010213	51	Female	Non-Small Cell Lung Cancer	PD-1/PDL-1	15.74	25	0
P-0002794	61	Female	Non-Small Cell Lung Cancer	PD-1/PDL-1	1.12	25	0
P-0002731	64	Female	Non-Small Cell Lung Cancer	PD-1/PDL-1	9.84	25	0
P-0002546	68	Male	Non-Small Cell Lung Cancer	Combo	4.46	25	1
P-0015078	71	Female	Non-Small Cell Lung Cancer	PD-1/PDL-1	7.9	25	0
P-0002151	71	Female	Non-Small Cell Lung Cancer	PD-1/PDL-1	10.04	25	0
P-0008678	73	Female	Non-Small Cell Lung Cancer	PD-1/PDL-1	7.87	25	0
P-0002295	77	Female	Non-Small Cell Lung Cancer	PD-1/PDL-1	4.46	25	1
P-0009293	81	Female	Non-Small Cell Lung Cancer	PD-1/PDL-1	21.64	25	0
P-0010184	59	Female	Renal Cell Carcinoma	PD-1/PDL-1	2.95	25	0
P-0006392	72	Male	Renal Cell Carcinoma	PD-1/PDL-1	3.94	25	0
P-0009347	72	Male	Renal Cell Carcinoma	Combo	9.84	25	0
P-0004150	73	Male	Renal Cell Carcinoma	PD-1/PDL-1	5.9	25	0
P-0015649	75	Male	Bladder Cancer	Combo	46.52	24	1
P-0008595	78	Female	Bladder Cancer	PD-1/PDL-1	21.6434	24	0
P-0008403	50	Male	Melanoma	Combo	21.64	24	0
P-0009072	56	Male	Melanoma	Combo	4.92	24	0
P-0009950	58	Male	Melanoma	Combo	69.85	24	0
P-0009292	60	Male	Melanoma	PD-1/PDL-1	8.85	24	0
P-0008009	60	Male	Melanoma	Combo	9.84	24	0
P-0003749	61	Male	Melanoma	Combo	4.92	24	0
P-0002914	65	Male	Melanoma	Combo	25.65	24	1
P-0008490	67	Female	Melanoma	PD-1/PDL-1	5.9	24	0
P-0008857	74	Female	Melanoma	PD-1/PDL-1	51.16	24	0
P-0009189	81	Male	Melanoma	Combo	66.9	24	0
P-0002485	45	Male	Non-Small Cell Lung Cancer	PD-1/PDL-1	3.35	24	1
P-0009586	56	Female	Non-Small Cell Lung Cancer	PD-1/PDL-1	11.81	24	0
P-0006047	63	Female	Non-Small Cell Lung Cancer	PD-1/PDL-1	1.97	24	0
P-0008786	65	Male	Non-Small Cell Lung Cancer	PD-1/PDL-1	4.92	24	0
P-0007123	67	Female	Non-Small Cell Lung Cancer	PD-1/PDL-1	8.85	24	0
P-0004436	75	Male	Non-Small Cell Lung Cancer	PD-1/PDL-1	5.9	24	1
P-0004458	44	Male	Renal Cell Carcinoma	PD-1/PDL-1	6.89	24	0
P-0006055	47	Female	Renal Cell Carcinoma	Combo	5.9	24	1
P-0009788	49	Male	Renal Cell Carcinoma	PD-1/PDL-1	1.97	24	0
P-0009717	51	Male	Renal Cell Carcinoma	PD-1/PDL-1	3.94	24	0
P-0010791	51	Male	Renal Cell Carcinoma	PD-1/PDL-1	3.94	24	0
P-0009906	53	Male	Renal Cell Carcinoma	PD-1/PDL-1	3.94	24	0
P-0006222	61	Female	Renal Cell Carcinoma	PD-1/PDL-1	4.92	24	1
P-0006381	63	Male	Renal Cell Carcinoma	PD-1/PDL-1	1.97	24	1
P-0008249	69	Male	Renal Cell Carcinoma	PD-1/PDL-1	2.95	24	0
P-0000740	69	Female	Renal Cell Carcinoma	PD-1/PDL-1	5.58	24	0
P-0012256	69	Male	Renal Cell Carcinoma	PD-1/PDL-1	6.89	24	0
P-0003377	64	Male	Bladder Cancer	PD-1/PDL-1	13.773	23	0
P-0008290	75	Male	Bladder Cancer	PD-1/PDL-1	7.87031	23	0
P-0001882	55	Male	Glioma	PD-1/PDL-1	35.69	23	0
P-0016238	57	Male	Glioma	PD-1/PDL-1	2.63	23	0
P-0008434	51	Female	Melanoma	PD-1/PDL-1	52.14	23	0
P-0010340	52	Male	Melanoma	CTLA4	53.12	23	0
P-0010327	53	Male	Melanoma	Combo	0.98	23	0
P-0010115	53	Male	Melanoma	PD-1/PDL-1	53.12	23	0
P-0009345	55	Female	Melanoma	Combo	1.97	23	0
P-0008997	56	Female	Melanoma	Combo	65.91	23	0
P-0009736	64	Male	Melanoma	Combo	13.77	23	0
P-0009944	72	Female	Melanoma	Combo	1.97	23	0
P-0005655	74	Female	Melanoma	PD-1/PDL-1	3.94	23	0
P-0008946	87	Female	Melanoma	PD-1/PDL-1	16.72	23	0
P-0004103	44	Female	Non-Small Cell Lung Cancer	Combo	0.98	23	1
P-0006713	52	Female	Non-Small Cell Lung Cancer	PD-1/PDL-1	45.25	23	0
P-0008176	72	Female	Non-Small Cell Lung Cancer	PD-1/PDL-1	3.94	23	0
P-0009501	73	Male	Non-Small Cell Lung Cancer	PD-1/PDL-1	5.9	23	1
P-0009473	80	Male	Non-Small Cell Lung Cancer	PD-1/PDL-1	8.85	23	0
P-0012221	54	Male	Renal Cell Carcinoma	PD-1/PDL-1	3.94	23	0
P-0012682	59	Male	Renal Cell Carcinoma	PD-1/PDL-1	5.9	23	0
P-0001232	62	Male	Renal Cell Carcinoma	PD-1/PDL-1	4.46	23	0
P-0007834	63	Female	Renal Cell Carcinoma	PD-1/PDL-1	6.89	23	0
P-0007961	63	Male	Renal Cell Carcinoma	PD-1/PDL-1	7.87	23	1
P-0015983	66	Female	Renal Cell Carcinoma	PD-1/PDL-1	5.27	23	0
P-0009517	79	Male	Renal Cell Carcinoma	PD-1/PDL-1	4.92	23	1
P-0016316	68	Female	Bladder Cancer	PD-1/PDL-1	3.51086	22	0
P-0002576	78	Male	Bladder Cancer	PD-1/PDL-1	2.95137	22	1
P-0012706	80	Male	Bladder Cancer	PD-1/PDL-1	1.96758	22	0
P-0010516	42	Female	Glioma	PD-1/PDL-1	2.95	22	0
P-0009711	60	Male	Glioma	PD-1/PDL-1	3.94	22	1
P-0006416	64	Male	Glioma	PD-1/PDL-1	2.95	22	1
P-0004132	42	Male	Melanoma	Combo	5.9	22	1
P-0009308	48	Female	Melanoma	Combo	1.97	22	0
P-0010737	56	Male	Melanoma	CTLA4	2.95	22	1
P-0010847	59	Male	Melanoma	PD-1/PDL-1	19.68	22	0
P-0002165	63	Male	Melanoma	Combo	2.23	22	0
P-0010760	51	Male	Non-Small Cell Lung Cancer	PD-1/PDL-1	4.92	22	0
P-0007418	57	Female	Non-Small Cell Lung Cancer	PD-1/PDL-1	16.72	22	0
P-0004517	68	Male	Non-Small Cell Lung Cancer	PD-1/PDL-1	13.77	22	1
P-0007916	69	Male	Non-Small Cell Lung Cancer	PD-1/PDL-1	14.76	22	0
P-0009068	74	Female	Non-Small Cell Lung Cancer	PD-1/PDL-1	19.68	22	0
P-0003003	61	Male	Renal Cell Carcinoma	PD-1/PDL-1	4.46	22	0
P-0012519	61	Male	Renal Cell Carcinoma	PD-1/PDL-1	4.92	22	0
P-0012516	63	Male	Renal Cell Carcinoma	PD-1/PDL-1	3.94	22	0
P-0011418	67	Male	Renal Cell Carcinoma	PD-1/PDL-1	3.94	22	0
P-0011523	64	Female	Bladder Cancer	PD-1/PDL-1	5.90273	21	0
P-0014648	67	Male	Bladder Cancer	PD-1/PDL-1	6.144	21	0
P-0015615	70	Male	Bladder Cancer	PD-1/PDL-1	2.63314	21	0
P-0000535	76	Female	Bladder Cancer	PD-1/PDL-1	26.7658	21	0
P-0004783	43	Male	Colorectal Cancer	Combo	47.2219	21	0
P-0010238	52	Female	Colorectal Cancer	PD-1/PDL-1	7.87031	21	1
P-0004812	43	Male	Glioma	PD-1/PDL-1	3.94	21	0
P-0002633	49	Male	Glioma	Combo	22.3	21	1
P-0009411	52	Female	Glioma	PD-1/PDL-1	62.96	21	1
P-0013938	55	Male	Glioma	PD-1/PDL-1	1.97	21	1
P-0002265	68	Male	Glioma	PD-1/PDL-1	2.23	21	0
P-0012107	66	Male	Head and Neck Cancer	PD-1/PDL-1	11.8055	21	0
P-0008792	70	Male	Head and Neck Cancer	PD-1/PDL-1	10.8217	21	0
P-0002353	47	Female	Melanoma	CTLA4	20.07	21	1
P-0000898	54	Male	Melanoma	CTLA4	4.46	21	1
P-0012080	59	Male	Melanoma	CTLA4	25.58	21	0
P-0009324	87	Male	Melanoma	PD-1/PDL-1	22.63	21	0
P-0009349	88	Female	Melanoma	PD-1/PDL-1	35.42	21	0
P-0007119	61	Male	Non-Small Cell Lung Cancer	PD-1/PDL-1	22.63	21	0
P-0003229	61	Male	Non-Small Cell Lung Cancer	PD-1/PDL-1	49.19	21	1
P-0006084	62	Male	Non-Small Cell Lung Cancer	PD-1/PDL-1	6.89	21	1
P-0003553	70	Female	Non-Small Cell Lung Cancer	PD-1/PDL-1	30.5	21	0
P-0005898	71	Female	Non-Small Cell Lung Cancer	PD-1/PDL-1	3.94	21	0
P-0010256	73	Female	Non-Small Cell Lung Cancer	PD-1/PDL-1	3.94	21	1
P-0003495	90	Female	Non-Small Cell Lung Cancer	PD-1/PDL-1	3.94	21	1
P-0006539	44	Male	Renal Cell Carcinoma	Combo	4.92	21	1
P-0004412	55	Male	Renal Cell Carcinoma	PD-1/PDL-1	3.94	21	0
P-0008964	57	Male	Renal Cell Carcinoma	PD-1/PDL-1	1.97	21	0
P-0008830	58	Male	Renal Cell Carcinoma	PD-1/PDL-1	1.97	21	0
P-0008772	65	Male	Renal Cell Carcinoma	PD-1/PDL-1	3.94	21	0
P-0005750	72	Male	Renal Cell Carcinoma	PD-1/PDL-1	7.87	21	0
P-0002976	77	Male	Renal Cell Carcinoma	PD-1/PDL-1	2.23	21	1
P-0009101	58	Male	Bladder Cancer	PD-1/PDL-1	10.8217	20	0
P-0006934	63	Male	Bladder Cancer	PD-1/PDL-1	4.91895	20	0
P-0006735	71	Male	Colorectal Cancer	PD-1/PDL-1	3.93516	20	0
P-0006045	64	Female	Glioma	PD-1/PDL-1	2.95	20	1
P-0011119	66	Female	Glioma	PD-1/PDL-1	1.97	20	1
P-0004492	66	Male	Head and Neck Cancer	PD-1/PDL-1	2.95137	20	1
P-0012446	45	Female	Melanoma	Combo	26.56	20	0
P-0012551	61	Female	Melanoma	CTLA4	11.81	20	0
P-0009435	66	Female	Melanoma	PD-1/PDL-1	0.98	20	0
P-0015407	66	Male	Melanoma	Combo	35.11	20	0
P-0009108	69	Male	Melanoma	Combo	40.34	20	0
P-0013111	70	Male	Melanoma	PD-1/PDL-1	20.66	20	0
P-0014910	71	Male	Melanoma	PD-1/PDL-1	35.99	20	0
P-0009833	54	Female	Non-Small Cell Lung Cancer	PD-1/PDL-1	32.47	20	0
P-0013189	58	Female	Non-Small Cell Lung Cancer	PD-1/PDL-1	1.97	20	0
P-0012846	59	Female	Non-Small Cell Lung Cancer	PD-1/PDL-1	7.87	20	0
P-0009419	61	Male	Non-Small Cell Lung Cancer	PD-1/PDL-1	11.81	20	0
P-0009660	61	Male	Non-Small Cell Lung Cancer	PD-1/PDL-1	23.61	20	0
P-0015648	67	Male	Non-Small Cell Lung Cancer	PD-1/PDL-1	4.39	20	0
P-0012678	73	Male	Non-Small Cell Lung Cancer	PD-1/PDL-1	23.61	20	0
P-0003670	75	Female	Non-Small Cell Lung Cancer	PD-1/PDL-1	0.98	20	0
P-0016284	80	Male	Non-Small Cell Lung Cancer	PD-1/PDL-1	0.88	20	0
P-0014064	60	Male	Renal Cell Carcinoma	PD-1/PDL-1	1.97	20	0
P-0013463	60	Male	Renal Cell Carcinoma	PD-1/PDL-1	4.92	20	0
P-0013368	61	Male	Renal Cell Carcinoma	PD-1/PDL-1	1.97	20	0
P-0005332	66	Female	Renal Cell Carcinoma	PD-1/PDL-1	3.94	20	1
P-0005682	66	Male	Renal Cell Carcinoma	PD-1/PDL-1	3.94	20	1
P-0006535	57	Female	Bladder Cancer	PD-1/PDL-1	5.90273	19	1
P-0001074	60	Male	Bladder Cancer	PD-1/PDL-1	22.3049	19	1
P-0006628	65	Male	Bladder Cancer	PD-1/PDL-1	4.91895	19	0
P-0017313	79	Male	Bladder Cancer	PD-1/PDL-1	3.51086	19	1
P-0013096	37	Male	Colorectal Cancer	PD-1/PDL-1	2.95137	19	0
P-0012115	49	Male	Colorectal Cancer	PD-1/PDL-1	54.1084	19	0
P-0011401	53	Female	Glioma	PD-1/PDL-1	2.95	19	1
P-0021621	53	Female	Head and Neck Cancer	PD-1/PDL-1	3.51086	19	0
P-0014015	67	Male	Head and Neck Cancer	PD-1/PDL-1	10.8217	19	0
P-0015007	20	Male	Melanoma	PD-1/PDL-1	7.02	19	0
P-0009527	42	Female	Melanoma	Combo	13.77	19	0
P-0012968	61	Male	Melanoma	Combo	10.82	19	0
P-0013200	69	Female	Melanoma	Combo	1.97	19	0
P-0013525	69	Female	Melanoma	CTLA4	10.82	19	0
P-0012420	73	Male	Melanoma	PD-1/PDL-1	11.81	19	0
P-0002517	74	Male	Melanoma	CTLA4	2.23	19	1
P-0008870	76	Female	Melanoma	PD-1/PDL-1	0.98	19	0
P-0009747	82	Male	Melanoma	PD-1/PDL-1	25.58	19	1
P-0013309	83	Female	Melanoma	Combo	0.98	19	0
P-0013448	83	Male	Melanoma	PD-1/PDL-1	13.77	19	0
P-0012866	51	Female	Non-Small Cell Lung Cancer	PD-1/PDL-1	5.9	19	1
P-0006071	52	Female	Non-Small Cell Lung Cancer	PD-1/PDL-1	17.71	19	0
P-0004827	59	Male	Non-Small Cell Lung Cancer	PD-1/PDL-1	7.87	19	1
P-0006895	65	Male	Non-Small Cell Lung Cancer	PD-1/PDL-1	36.4	19	0
P-0002247	69	Female	Non-Small Cell Lung Cancer	PD-1/PDL-1	21.19	19	1
P-0006582	72	Female	Non-Small Cell Lung Cancer	PD-1/PDL-1	4.92	19	0
P-0013078	42	Female	Renal Cell Carcinoma	PD-1/PDL-1	2.95	19	0
P-0005177	53	Male	Renal Cell Carcinoma	PD-1/PDL-1	0.98	19	1
P-0007540	58	Female	Renal Cell Carcinoma	PD-1/PDL-1	5.9	19	0
P-0005965	62	Female	Renal Cell Carcinoma	PD-1/PDL-1	4.92	19	0
P-0004226	52	Male	Bladder Cancer	PD-1/PDL-1	6.88652	18	0
P-0002472	56	Male	Bladder Cancer	PD-1/PDL-1	3.34573	18	1
P-0007656	57	Male	Bladder Cancer	PD-1/PDL-1	14.7568	18	0
P-0017276	60	Male	Bladder Cancer	PD-1/PDL-1	5.26629	18	1
P-0008062	74	Female	Bladder Cancer	PD-1/PDL-1	7.87031	18	0
P-0020878	46	Male	Colorectal Cancer	PD-1/PDL-1	2.63314	18	0
P-0014006	63	Male	Glioma	PD-1/PDL-1	1.97	18	1
P-0009119	67	Male	Glioma	PD-1/PDL-1	7.87	18	1
P-0010088	61	Male	Head and Neck Cancer	PD-1/PDL-1	12.7893	18	0
P-0003742	36	Female	Melanoma	CTLA4	5.9	18	1
P-0015679	47	Male	Melanoma	Combo	5.27	18	0
P-0008445	50	Male	Melanoma	Combo	6.89	18	0
P-0009084	51	Male	Melanoma	Combo	3.94	18	1
P-0015717	56	Male	Melanoma	Combo	1.76	18	0
P-0012856	58	Male	Melanoma	PD-1/PDL-1	38.37	18	0
P-0014242	60	Male	Melanoma	Combo	26.33	18	0
P-0005109	61	Male	Melanoma	Combo	17.71	18	0
P-0012315	62	Female	Melanoma	PD-1/PDL-1	13.77	18	0
P-0013318	67	Male	Melanoma	PD-1/PDL-1	7.87	18	0
P-0013389	69	Male	Melanoma	PD-1/PDL-1	5.9	18	0
P-0011047	81	Female	Melanoma	PD-1/PDL-1	36.4	18	0
P-0006724	48	Female	Non-Small Cell Lung Cancer	PD-1/PDL-1	23.61	18	0
P-0015780	53	Male	Non-Small Cell Lung Cancer	PD-1/PDL-1	6.14	18	0
P-0012817	55	Male	Non-Small Cell Lung Cancer	PD-1/PDL-1	34.43	18	0
P-0004742	69	Male	Non-Small Cell Lung Cancer	PD-1/PDL-1	7.87	18	0
P-0004890	69	Female	Non-Small Cell Lung Cancer	PD-1/PDL-1	11.81	18	0
P-0010648	73	Male	Non-Small Cell Lung Cancer	PD-1/PDL-1	1.97	18	1
P-0004232	75	Male	Non-Small Cell Lung Cancer	PD-1/PDL-1	6.89	18	1
P-0005851	80	Male	Non-Small Cell Lung Cancer	PD-1/PDL-1	20.66	18	0
P-0010736	80	Male	Non-Small Cell Lung Cancer	PD-1/PDL-1	25.58	18	1
P-0012629	82	Male	Non-Small Cell Lung Cancer	PD-1/PDL-1	2.95	18	1
P-0007806	53	Female	Renal Cell Carcinoma	Combo	2.95	18	1
P-0006738	56	Male	Renal Cell Carcinoma	PD-1/PDL-1	3.94	18	0
P-0014619	60	Male	Renal Cell Carcinoma	PD-1/PDL-1	2.63	18	0
P-0013967	60	Male	Renal Cell Carcinoma	PD-1/PDL-1	7.87	18	0
P-0015342	61	Male	Renal Cell Carcinoma	PD-1/PDL-1	2.63	18	0
P-0010199	56	Male	Bladder Cancer	PD-1/PDL-1	17.7082	17	0
P-0015137	81	Male	Bladder Cancer	PD-1/PDL-1	14.0434	17	1
P-0011357	53	Male	Colorectal Cancer	PD-1/PDL-1	203.644	17	0
P-0000682	62	Male	Colorectal Cancer	PD-1/PDL-1	13.3829	17	0
P-0000762	67	Male	Colorectal Cancer	PD-1/PDL-1	4.46097	17	1
P-0005522	73	Female	Colorectal Cancer	PD-1/PDL-1	6.88652	17	0
P-0004971	45	Male	Glioma	PD-1/PDL-1	4.92	17	1
P-0014677	50	Male	Glioma	PD-1/PDL-1	2.63	17	0
P-0007693	55	Male	Glioma	PD-1/PDL-1	5.9	17	1
P-0013380	58	Male	Glioma	PD-1/PDL-1	2.95	17	0
P-0015373	34	Male	Melanoma	Combo	30.72	17	0
P-0015977	42	Female	Melanoma	Combo	2.63	17	0
P-0014379	48	Male	Melanoma	PD-1/PDL-1	1.76	17	0
P-0000922	51	Male	Melanoma	CTLA4	4.46	17	1
P-0014206	55	Male	Melanoma	Combo	24.58	17	0
P-0013451	58	Female	Melanoma	Combo	3.94	17	0
P-0014966	66	Male	Melanoma	PD-1/PDL-1	6.14	17	0
P-0012282	70	Male	Melanoma	CTLA4	10.82	17	0
P-0014236	78	Male	Melanoma	Combo	1.76	17	0
P-0013659	81	Male	Melanoma	PD-1/PDL-1	9.84	17	0
P-0015182	83	Male	Melanoma	PD-1/PDL-1	3.51	17	0
P-0012408	83	Male	Melanoma	PD-1/PDL-1	15.74	17	0
P-0013383	84	Female	Melanoma	Combo	48.21	17	0
P-0005320	47	Male	Non-Small Cell Lung Cancer	PD-1/PDL-1	7.87	17	1
P-0000670	50	Female	Non-Small Cell Lung Cancer	Combo	5.58	17	0
P-0007121	59	Female	Non-Small Cell Lung Cancer	PD-1/PDL-1	7.87	17	0
P-0014599	63	Male	Non-Small Cell Lung Cancer	PD-1/PDL-1	14.92	17	0
P-0003275	69	Male	Non-Small Cell Lung Cancer	PD-1/PDL-1	2.95	17	1
P-0002225	72	Male	Non-Small Cell Lung Cancer	PD-1/PDL-1	1.12	17	1
P-0002940	52	Male	Renal Cell Carcinoma	PD-1/PDL-1	2.23	17	0
P-0003283	63	Male	Renal Cell Carcinoma	PD-1/PDL-1	2.95	17	0
P-0011097	79	Male	Renal Cell Carcinoma	PD-1/PDL-1	5.9	17	0
P-0005489	50	Male	Bladder Cancer	PD-1/PDL-1	12.7893	16	1
P-0012183	77	Male	Bladder Cancer	PD-1/PDL-1	8.8541	16	0
P-0024544	79	Female	Bladder Cancer	PD-1/PDL-1	35.9863	16	0
P-0014470	80	Male	Bladder Cancer	PD-1/PDL-1	21.9429	16	0
P-0008841	68	Female	Colorectal Cancer	PD-1/PDL-1	3.93516	16	0
P-0015289	23	Male	Glioma	PD-1/PDL-1	2.63	16	0
P-0004778	45	Male	Glioma	PD-1/PDL-1	0.98	16	1
P-0007504	50	Male	Glioma	PD-1/PDL-1	2.95	16	1
P-0003350	59	Male	Glioma	PD-1/PDL-1	3.94	16	1
P-0008166	64	Male	Glioma	PD-1/PDL-1	3.94	16	1
P-0009790	70	Male	Glioma	PD-1/PDL-1	2.95	16	1
P-0001388	77	Male	Glioma	PD-1/PDL-1	6.69	16	1
P-0010241	41	Female	Head and Neck Cancer	PD-1/PDL-1	66.8977	16	0
P-0016562	45	Male	Head and Neck Cancer	PD-1/PDL-1	7.89943	16	0
P-0013892	68	Male	Head and Neck Cancer	PD-1/PDL-1	1.96758	16	1
P-0014229	45	Female	Melanoma	PD-1/PDL-1	30.72	16	0
P-0011476	49	Male	Melanoma	PD-1/PDL-1	6.89	16	0
P-0015855	54	Male	Melanoma	PD-1/PDL-1	11.41	16	0
P-0012550	60	Female	Melanoma	PD-1/PDL-1	59.03	16	0
P-0012361	71	Male	Melanoma	PD-1/PDL-1	47.22	16	1
P-0014682	83	Male	Melanoma	PD-1/PDL-1	0.88	16	0
P-0015512	85	Male	Melanoma	PD-1/PDL-1	100.06	16	0
P-0000893	90	Male	Melanoma	CTLA4	5.58	16	1
P-0009764	51	Female	Non-Small Cell Lung Cancer	PD-1/PDL-1	22.63	16	0
P-0014529	65	Female	Non-Small Cell Lung Cancer	PD-1/PDL-1	21.07	16	0
P-0006768	66	Male	Non-Small Cell Lung Cancer	PD-1/PDL-1	7.87	16	0
P-0010636	68	Male	Non-Small Cell Lung Cancer	PD-1/PDL-1	5.9	16	1
P-0016046	69	Female	Non-Small Cell Lung Cancer	PD-1/PDL-1	5.27	16	0
P-0009762	71	Male	Non-Small Cell Lung Cancer	PD-1/PDL-1	7.87	16	1
P-0004189	71	Male	Non-Small Cell Lung Cancer	PD-1/PDL-1	59.03	16	0
P-0002270	33	Male	Renal Cell Carcinoma	PD-1/PDL-1	4.46	16	0
P-0014594	61	Male	Renal Cell Carcinoma	PD-1/PDL-1	2.63	16	0
P-0008522	63	Female	Renal Cell Carcinoma	PD-1/PDL-1	7.87	16	1
P-0011522	81	Female	Renal Cell Carcinoma	PD-1/PDL-1	6.89	16	0
P-0003719	43	Female	Bladder Cancer	PD-1/PDL-1	48.2057	15	1
P-0005842	64	Male	Bladder Cancer	PD-1/PDL-1	40.3354	15	0
P-0002292	70	Male	Bladder Cancer	PD-1/PDL-1	14.4982	15	1
P-0015966	71	Male	Bladder Cancer	PD-1/PDL-1	23.6983	15	0
P-0010079	72	Male	Bladder Cancer	PD-1/PDL-1	2.95137	15	0
P-0003955	75	Male	Bladder Cancer	PD-1/PDL-1	6.69146	15	1
P-0015716	76	Male	Bladder Cancer	PD-1/PDL-1	6.144	15	0
P-0015920	80	Male	Bladder Cancer	PD-1/PDL-1	43.008	15	0
P-0012840	81	Male	Bladder Cancer	PD-1/PDL-1	6.88652	15	1
P-0010742	51	Female	Colorectal Cancer	PD-1/PDL-1	4.91895	15	1
P-0008651	55	Female	Colorectal Cancer	PD-1/PDL-1	6.88652	15	0
P-0020399	62	Male	Colorectal Cancer	PD-1/PDL-1	61.44	15	0
P-0013462	82	Female	Colorectal Cancer	PD-1/PDL-1	43.2867	15	0
P-0001591	17	Male	Glioma	PD-1/PDL-1	2.23	15	1
P-0010556	50	Male	Glioma	PD-1/PDL-1	0.98	15	1
P-0013603	53	Male	Glioma	PD-1/PDL-1	1.97	15	1
P-0013204	63	Male	Glioma	PD-1/PDL-1	4.92	15	0
P-0007104	70	Male	Glioma	PD-1/PDL-1	3.94	15	0
P-0013814	72	Male	Glioma	PD-1/PDL-1	5.9	15	0
P-0005929	74	Female	Glioma	PD-1/PDL-1	5.9	15	1
P-0008939	77	Female	Glioma	PD-1/PDL-1	3.94	15	1
P-0007388	31	Female	Head and Neck Cancer	PD-1/PDL-1	11.8055	15	1
P-0009202	66	Male	Head and Neck Cancer	PD-1/PDL-1	11.8055	15	0
P-0007220	67	Male	Head and Neck Cancer	PD-1/PDL-1	10.8217	15	0
P-0002818	70	Female	Head and Neck Cancer	PD-1/PDL-1	20.0744	15	0
P-0016025	77	Female	Head and Neck Cancer	PD-1/PDL-1	24.576	15	0
P-0010707	79	Male	Head and Neck Cancer	PD-1/PDL-1	3.93516	15	1
P-0015511	33	Male	Melanoma	Combo	13.17	15	0
P-0001706	45	Male	Melanoma	PD-1/PDL-1	22.3	15	1
P-0015530	54	Male	Melanoma	PD-1/PDL-1	6.14	15	0
P-0015521	54	Male	Melanoma	PD-1/PDL-1	19.31	15	0
P-0008050	55	Male	Melanoma	PD-1/PDL-1	0.98	15	0
P-0009648	58	Male	Melanoma	PD-1/PDL-1	0.98	15	1
P-0013765	64	Male	Melanoma	Combo	7.87	15	0
P-0015612	66	Female	Melanoma	Combo	21.07	15	0
P-0009831	68	Female	Melanoma	PD-1/PDL-1	1.97	15	1
P-0016177	73	Male	Melanoma	PD-1/PDL-1	5.27	15	0
P-0015438	73	Male	Melanoma	Combo	69.34	15	0
P-0005115	54	Male	Non-Small Cell Lung Cancer	PD-1/PDL-1	1.97	15	0
P-0003347	59	Male	Non-Small Cell Lung Cancer	PD-1/PDL-1	14.76	15	1
P-0006294	63	Female	Non-Small Cell Lung Cancer	PD-1/PDL-1	3.94	15	1
P-0015348	63	Male	Non-Small Cell Lung Cancer	PD-1/PDL-1	10.53	15	0
P-0000302	65	Male	Non-Small Cell Lung Cancer	PD-1/PDL-1	1.12	15	0
P-0010715	67	Male	Non-Small Cell Lung Cancer	Combo	50.17	15	0
P-0015296	69	Male	Non-Small Cell Lung Cancer	PD-1/PDL-1	20.19	15	0
P-0016033	73	Male	Non-Small Cell Lung Cancer	PD-1/PDL-1	29.84	15	0
P-0015937	74	Female	Non-Small Cell Lung Cancer	PD-1/PDL-1	10.53	15	0
P-0008239	74	Female	Non-Small Cell Lung Cancer	PD-1/PDL-1	15.74	15	1
P-0015047	76	Female	Non-Small Cell Lung Cancer	PD-1/PDL-1	13.17	15	0
P-0016624	66	Male	Bladder Cancer	PD-1/PDL-1	11.4103	14	0
P-0016720	69	Male	Bladder Cancer	PD-1/PDL-1	5.26629	14	0
P-0015501	69	Male	Bladder Cancer	PD-1/PDL-1	15.7989	14	1
P-0015067	72	Male	Bladder Cancer	PD-1/PDL-1	8.77715	14	0
P-0019417	75	Male	Bladder Cancer	PD-1/PDL-1	17.5543	14	1
P-0006933	56	Female	Colorectal Cancer	PD-1/PDL-1	4.91895	14	1
P-0000818	33	Male	Glioma	PD-1/PDL-1	5.58	14	1
P-0000758	52	Male	Glioma	PD-1/PDL-1	4.46	14	1
P-0013347	55	Male	Glioma	PD-1/PDL-1	6.89	14	1
P-0014220	63	Male	Glioma	PD-1/PDL-1	5.27	14	0
P-0015603	64	Male	Glioma	PD-1/PDL-1	4.39	14	0
P-0017678	47	Male	Head and Neck Cancer	PD-1/PDL-1	10.5326	14	0
P-0018185	49	Female	Head and Neck Cancer	PD-1/PDL-1	5.26629	14	0
P-0016062	63	Male	Head and Neck Cancer	PD-1/PDL-1	10.5326	14	0
P-0012370	68	Male	Head and Neck Cancer	PD-1/PDL-1	0.983789	14	1
P-0023896	71	Male	Head and Neck Cancer	PD-1/PDL-1	3.51086	14	0
P-0015745	72	Male	Head and Neck Cancer	PD-1/PDL-1	5.26629	14	0
P-0010450	73	Male	Head and Neck Cancer	PD-1/PDL-1	8.8541	14	1
P-0016210	74	Male	Head and Neck Cancer	PD-1/PDL-1	4.38857	14	0
P-0012869	23	Female	Melanoma	PD-1/PDL-1	5.9	14	1
P-0008492	28	Male	Melanoma	Combo	2.95	14	1
P-0016506	46	Female	Melanoma	PD-1/PDL-1	3.51	14	0
P-0009074	66	Female	Melanoma	Combo	2.95	14	1
P-0015989	67	Male	Melanoma	PD-1/PDL-1	2.63	14	0
P-0016531	67	Male	Melanoma	Combo	3.51	14	0
P-0016697	68	Female	Melanoma	PD-1/PDL-1	0.87	14	0
P-0015257	68	Female	Melanoma	PD-1/PDL-1	60.56	14	0
P-0015697	69	Female	Melanoma	PD-1/PDL-1	18.43	14	0
P-0013413	76	Male	Melanoma	CTLA4	25.58	14	1
P-0002305	80	Male	Melanoma	CTLA4	8.92	14	0
P-0015830	83	Male	Melanoma	PD-1/PDL-1	51.79	14	0
P-0016648	87	Male	Melanoma	PD-1/PDL-1	1.76	14	0
P-0008295	58	Male	Non-Small Cell Lung Cancer	PD-1/PDL-1	5.9	14	0
P-0006046	59	Male	Non-Small Cell Lung Cancer	PD-1/PDL-1	20.66	14	0
P-0005752	66	Male	Non-Small Cell Lung Cancer	PD-1/PDL-1	3.94	14	1
P-0006642	67	Female	Non-Small Cell Lung Cancer	PD-1/PDL-1	20.66	14	1
P-0015593	69	Female	Non-Small Cell Lung Cancer	PD-1/PDL-1	4.39	14	0
P-0016308	71	Female	Non-Small Cell Lung Cancer	PD-1/PDL-1	14.92	14	1
P-0016174	73	Female	Non-Small Cell Lung Cancer	PD-1/PDL-1	14.04	14	0
P-0015955	75	Female	Non-Small Cell Lung Cancer	PD-1/PDL-1	7.02	14	1
P-0005721	79	Male	Non-Small Cell Lung Cancer	PD-1/PDL-1	6.89	14	1
P-0005848	80	Female	Non-Small Cell Lung Cancer	PD-1/PDL-1	17.71	14	0
P-0015259	88	Male	Non-Small Cell Lung Cancer	PD-1/PDL-1	2.63	14	0
P-0005794	42	Male	Renal Cell Carcinoma	PD-1/PDL-1	1.97	14	0
P-0012279	64	Male	Renal Cell Carcinoma	PD-1/PDL-1	8.85	14	1
P-0002483	67	Female	Renal Cell Carcinoma	PD-1/PDL-1	6.69	14	1
P-0017044	53	Male	Bladder Cancer	PD-1/PDL-1	5.26629	13	0
P-0003097	82	Female	Bladder Cancer	PD-1/PDL-1	6.88652	13	1
P-0007090	52	Male	Colorectal Cancer	PD-1/PDL-1	4.91895	13	1
P-0001170	65	Male	Colorectal Cancer	PD-1/PDL-1	8.92195	13	1
P-0000749	28	Male	Glioma	PD-1/PDL-1	8.92	13	0
P-0013259	47	Female	Glioma	PD-1/PDL-1	3.94	13	1
P-0013544	50	Male	Glioma	PD-1/PDL-1	4.39	13	1
P-0013360	51	Male	Glioma	PD-1/PDL-1	4.92	13	0
P-0016691	54	Male	Glioma	PD-1/PDL-1	1.76	13	0
P-0003783	54	Male	Glioma	PD-1/PDL-1	2.95	13	1
P-0011219	67	Male	Glioma	PD-1/PDL-1	4.92	13	1
P-0009451	69	Male	Glioma	PD-1/PDL-1	5.9	13	1
P-0005971	25	Female	Melanoma	Combo	3.94	13	1
P-0010111	35	Female	Melanoma	CTLA4	2.95	13	0
P-0004706	39	Male	Melanoma	Combo	3.94	13	1
P-0006946	51	Male	Melanoma	CTLA4	2.95	13	1
P-0013412	60	Male	Melanoma	Combo	3.94	13	0
P-0006971	62	Male	Melanoma	CTLA4	1.97	13	1
P-0013274	67	Male	Melanoma	PD-1/PDL-1	7.87	13	1
P-0009019	68	Male	Melanoma	PD-1/PDL-1	2.95	13	1
P-0015471	70	Male	Melanoma	PD-1/PDL-1	1.76	13	0
P-0010915	70	Female	Melanoma	PD-1/PDL-1	19.68	13	1
P-0010670	71	Male	Melanoma	Combo	11.81	13	0
P-0012999	71	Male	Melanoma	Combo	21.64	13	1
P-0005725	71	Male	Melanoma	PD-1/PDL-1	26.56	13	0
P-0005366	74	Male	Melanoma	PD-1/PDL-1	150.52	13	1
P-0005260	77	Female	Melanoma	PD-1/PDL-1	11.8	13	0
P-0015010	85	Male	Melanoma	PD-1/PDL-1	1.76	13	0
P-0003967	49	Female	Non-Small Cell Lung Cancer	PD-1/PDL-1	4.92	13	0
P-0015600	50	Female	Non-Small Cell Lung Cancer	PD-1/PDL-1	4.39	13	1
P-0004279	59	Female	Non-Small Cell Lung Cancer	PD-1/PDL-1	2.95	13	0
P-0009161	63	Female	Non-Small Cell Lung Cancer	PD-1/PDL-1	10.82	13	0
P-0009959	66	Male	Non-Small Cell Lung Cancer	PD-1/PDL-1	2.95	13	1
P-0002444	67	Male	Non-Small Cell Lung Cancer	PD-1/PDL-1	16.73	13	1
P-0000208	69	Female	Non-Small Cell Lung Cancer	PD-1/PDL-1	2.23	13	1
P-0016910	70	Female	Non-Small Cell Lung Cancer	PD-1/PDL-1	2.63	13	0
P-0013233	70	Female	Non-Small Cell Lung Cancer	PD-1/PDL-1	7.87	13	0
P-0003322	72	Female	Non-Small Cell Lung Cancer	Combo	2.95	13	0
P-0015214	74	Female	Non-Small Cell Lung Cancer	PD-1/PDL-1	24.58	13	1
P-0007493	75	Male	Non-Small Cell Lung Cancer	PD-1/PDL-1	18.69	13	0
P-0011541	77	Female	Non-Small Cell Lung Cancer	PD-1/PDL-1	3.94	13	0
P-0009924	79	Male	Non-Small Cell Lung Cancer	PD-1/PDL-1	17.71	13	0
P-0012908	80	Male	Non-Small Cell Lung Cancer	PD-1/PDL-1	6.89	13	1
P-0004463	83	Male	Non-Small Cell Lung Cancer	PD-1/PDL-1	6.89	13	1
P-0015758	89	Female	Non-Small Cell Lung Cancer	PD-1/PDL-1	5.27	13	0
P-0003406	35	Male	Renal Cell Carcinoma	PD-1/PDL-1	2.95	13	1
P-0003117	54	Female	Renal Cell Carcinoma	PD-1/PDL-1	4.92	13	1
P-0002864	65	Male	Renal Cell Carcinoma	Combo	3.35	13	1
P-0015433	68	Male	Renal Cell Carcinoma	PD-1/PDL-1	0.88	13	0
P-0009263	39	Male	Bladder Cancer	Combo	24.5947	12	1
P-0000088	63	Male	Bladder Cancer	PD-1/PDL-1	13.3829	12	1
P-0019717	63	Male	Bladder Cancer	PD-1/PDL-1	14.9212	12	0
P-0016855	68	Male	Bladder Cancer	PD-1/PDL-1	7.89943	12	0
P-0020542	73	Male	Bladder Cancer	PD-1/PDL-1	6.144	12	0
P-0020047	76	Female	Bladder Cancer	PD-1/PDL-1	11.4103	12	0
P-0012133	39	Male	Colorectal Cancer	Combo	3.93516	12	1
P-0001531	40	Male	Colorectal Cancer	PD-1/PDL-1	4.46097	12	0
P-0014565	53	Female	Colorectal Cancer	PD-1/PDL-1	6.144	12	1
P-0012249	64	Female	Colorectal Cancer	PD-1/PDL-1	37.384	12	0
P-0015237	75	Female	Colorectal Cancer	PD-1/PDL-1	52.6629	12	0
P-0016048	25	Female	Glioma	PD-1/PDL-1	4.39	12	1
P-0002386	33	Female	Glioma	PD-1/PDL-1	5.58	12	1
P-0006970	48	Male	Glioma	PD-1/PDL-1	4.92	12	1
P-0003567	50	Male	Glioma	PD-1/PDL-1	3.94	12	1
P-0007917	60	Male	Glioma	PD-1/PDL-1	3.94	12	1
P-0007384	50	Male	Head and Neck Cancer	Combo	4.91895	12	1
P-0014965	53	Male	Head and Neck Cancer	PD-1/PDL-1	1.75543	12	0
P-0017717	66	Male	Head and Neck Cancer	PD-1/PDL-1	4.38857	12	0
P-0012966	57	Female	Melanoma	PD-1/PDL-1	2.95	12	1
P-0008733	72	Male	Melanoma	PD-1/PDL-1	8.85	12	1
P-0007876	72	Female	Melanoma	PD-1/PDL-1	37.38	12	0
P-0010937	79	Male	Melanoma	CTLA4	37.38	12	1
P-0016276	86	Female	Melanoma	PD-1/PDL-1	6.14	12	0
P-0003970	46	Female	Non-Small Cell Lung Cancer	PD-1/PDL-1	2.95	12	1
P-0004120	58	Female	Non-Small Cell Lung Cancer	PD-1/PDL-1	0.98	12	0
P-0006268	71	Male	Non-Small Cell Lung Cancer	PD-1/PDL-1	1.97	12	1
P-0002921	73	Female	Non-Small Cell Lung Cancer	PD-1/PDL-1	14.5	12	1
P-0007083	76	Male	Non-Small Cell Lung Cancer	PD-1/PDL-1	14.04	12	1
P-0007861	77	Female	Non-Small Cell Lung Cancer	PD-1/PDL-1	2.95	12	1
P-0014818	83	Male	Non-Small Cell Lung Cancer	PD-1/PDL-1	28.96	12	1
P-0006415	85	Male	Non-Small Cell Lung Cancer	PD-1/PDL-1	4.92	12	1
P-0010603	62	Male	Renal Cell Carcinoma	PD-1/PDL-1	5.9	12	0
P-0011162	68	Male	Renal Cell Carcinoma	PD-1/PDL-1	3.94	12	1
P-0005727	51	Male	Bladder Cancer	Combo	1.96758	11	1
P-0006570	61	Male	Bladder Cancer	PD-1/PDL-1	2.95137	11	1
P-0010921	62	Male	Bladder Cancer	PD-1/PDL-1	47.2219	11	1
P-0008575	67	Male	Bladder Cancer	PD-1/PDL-1	2.95137	11	1
P-0012870	72	Male	Bladder Cancer	PD-1/PDL-1	9.65486	11	1
P-0016546	73	Male	Bladder Cancer	PD-1/PDL-1	23.6983	11	1
P-0014422	74	Female	Bladder Cancer	PD-1/PDL-1	18.432	11	0
P-0000891	80	Male	Bladder Cancer	PD-1/PDL-1	12.2677	11	1
P-0021528	86	Male	Bladder Cancer	PD-1/PDL-1	14.9212	11	0
P-0023128	44	Male	Colorectal Cancer	PD-1/PDL-1	12.288	11	0
P-0010587	63	Female	Colorectal Cancer	PD-1/PDL-1	84.6059	11	0
P-0008746	68	Female	Colorectal Cancer	PD-1/PDL-1	48.2057	11	0
P-0004494	73	Female	Colorectal Cancer	PD-1/PDL-1	9.83789	11	0
P-0002620	19	Male	Glioma	PD-1/PDL-1	6.69	11	1
P-0019297	44	Female	Head and Neck Cancer	PD-1/PDL-1	5.26629	11	0
P-0007839	54	Male	Head and Neck Cancer	PD-1/PDL-1	1.96758	11	1
P-0002193	63	Male	Head and Neck Cancer	PD-1/PDL-1	1.11524	11	1
P-0007407	65	Male	Head and Neck Cancer	PD-1/PDL-1	12.7893	11	1
P-0007543	67	Male	Head and Neck Cancer	PD-1/PDL-1	3.93516	11	0
P-0017687	76	Female	Head and Neck Cancer	PD-1/PDL-1	7.89943	11	0
P-0008904	31	Female	Melanoma	Combo	1.97	11	1
P-0005687	53	Male	Melanoma	PD-1/PDL-1	2.95	11	1
P-0005121	57	Female	Melanoma	PD-1/PDL-1	2.95	11	0
P-0012780	61	Female	Melanoma	Combo	6.89	11	1
P-0010614	62	Female	Melanoma	PD-1/PDL-1	1.97	11	1
P-0013232	63	Male	Melanoma	PD-1/PDL-1	48.21	11	0
P-0014449	67	Male	Melanoma	Combo	1.76	11	1
P-0005180	72	Male	Melanoma	PD-1/PDL-1	1.97	11	1
P-0013313	79	Male	Melanoma	PD-1/PDL-1	5.9	11	1
P-0004457	83	Female	Melanoma	PD-1/PDL-1	39.35	11	1
P-0009245	88	Male	Melanoma	PD-1/PDL-1	24.59	11	1
P-0016287	90	Male	Melanoma	PD-1/PDL-1	4.39	11	1
P-0005129	90	Female	Melanoma	PD-1/PDL-1	9.84	11	1
P-0008944	47	Female	Non-Small Cell Lung Cancer	PD-1/PDL-1	10.82	11	1
P-0002965	56	Male	Non-Small Cell Lung Cancer	PD-1/PDL-1	7.81	11	1
P-0011033	62	Female	Non-Small Cell Lung Cancer	PD-1/PDL-1	2.95	11	1
P-0008442	65	Female	Non-Small Cell Lung Cancer	PD-1/PDL-1	4.92	11	1
P-0009426	65	Female	Non-Small Cell Lung Cancer	PD-1/PDL-1	10.82	11	1
P-0005464	67	Female	Non-Small Cell Lung Cancer	PD-1/PDL-1	6.89	11	1
P-0002639	67	Female	Non-Small Cell Lung Cancer	PD-1/PDL-1	12.27	11	0
P-0012049	68	Female	Non-Small Cell Lung Cancer	PD-1/PDL-1	10.82	11	0
P-0002751	69	Female	Non-Small Cell Lung Cancer	PD-1/PDL-1	2.23	11	1
P-0002351	73	Female	Non-Small Cell Lung Cancer	PD-1/PDL-1	7.81	11	1
P-0002941	50	Male	Renal Cell Carcinoma	PD-1/PDL-1	2.23	11	1
P-0008785	53	Female	Renal Cell Carcinoma	PD-1/PDL-1	3.94	11	1
P-0010046	54	Female	Renal Cell Carcinoma	PD-1/PDL-1	0.98	11	1
P-0003766	60	Male	Renal Cell Carcinoma	PD-1/PDL-1	4.92	11	1
P-0006586	64	Male	Renal Cell Carcinoma	PD-1/PDL-1	3.94	11	1
P-0015456	43	Female	Bladder Cancer	PD-1/PDL-1	6.144	10	0
P-0015661	55	Male	Bladder Cancer	PD-1/PDL-1	4.38857	10	0
P-0020065	73	Male	Bladder Cancer	PD-1/PDL-1	17.5543	10	0
P-0006097	76	Male	Bladder Cancer	PD-1/PDL-1	7.87031	10	0
P-0020086	80	Female	Bladder Cancer	PD-1/PDL-1	17.5543	10	0
P-0016618	81	Female	Bladder Cancer	PD-1/PDL-1	0.877715	10	0
P-0012281	39	Male	Colorectal Cancer	PD-1/PDL-1	2.95137	10	0
P-0005762	41	Male	Colorectal Cancer	PD-1/PDL-1	1.96758	10	0
P-0001771	44	Female	Colorectal Cancer	PD-1/PDL-1	4.46097	10	1
P-0016767	53	Female	Colorectal Cancer	PD-1/PDL-1	13.1657	10	0
P-0001808	58	Male	Colorectal Cancer	PD-1/PDL-1	178.439	10	0
P-0000940	67	Female	Colorectal Cancer	PD-1/PDL-1	10.0372	10	1
P-0008380	45	Male	Glioma	PD-1/PDL-1	2.95	10	1
P-0006848	53	Female	Glioma	PD-1/PDL-1	6.89	10	1
P-0008257	66	Male	Glioma	PD-1/PDL-1	7.87	10	1
P-0012687	80	Male	Glioma	PD-1/PDL-1	4.92	10	1
P-0002939	35	Male	Head and Neck Cancer	PD-1/PDL-1	1.11524	10	1
P-0003059	40	Female	Head and Neck Cancer	PD-1/PDL-1	2.95137	10	1
P-0002185	51	Male	Head and Neck Cancer	PD-1/PDL-1	6.69146	10	1
P-0019316	52	Male	Head and Neck Cancer	PD-1/PDL-1	8.77715	10	1
P-0016240	55	Female	Head and Neck Cancer	PD-1/PDL-1	3.51086	10	0
P-0020040	62	Male	Head and Neck Cancer	PD-1/PDL-1	3.51086	10	1
P-0010644	40	Male	Melanoma	PD-1/PDL-1	0.98	10	1
P-0002507	43	Female	Melanoma	PD-1/PDL-1	5.58	10	1
P-0001646	61	Female	Melanoma	CTLA4	1.12	10	1
P-0013951	81	Male	Melanoma	Combo	0.98	10	1
P-0010818	85	Male	Melanoma	PD-1/PDL-1	15.74	10	1
P-0012860	85	Male	Melanoma	PD-1/PDL-1	95.43	10	0
P-0001121	45	Female	Non-Small Cell Lung Cancer	PD-1/PDL-1	1.12	10	1
P-0015085	49	Female	Non-Small Cell Lung Cancer	PD-1/PDL-1	7.02	10	1
P-0010025	58	Female	Non-Small Cell Lung Cancer	PD-1/PDL-1	10.82	10	1
P-0005792	59	Male	Non-Small Cell Lung Cancer	PD-1/PDL-1	10.82	10	1
P-0007580	63	Female	Non-Small Cell Lung Cancer	PD-1/PDL-1	2.95	10	1
P-0004472	63	Female	Non-Small Cell Lung Cancer	PD-1/PDL-1	14.76	10	1
P-0015987	71	Female	Non-Small Cell Lung Cancer	PD-1/PDL-1	7.9	10	1
P-0012925	74	Male	Non-Small Cell Lung Cancer	PD-1/PDL-1	5.9	10	1
P-0009017	77	Male	Non-Small Cell Lung Cancer	PD-1/PDL-1	33.45	10	0
P-0014147	59	Male	Renal Cell Carcinoma	PD-1/PDL-1	6.89	10	1
P-0009414	58	Male	Bladder Cancer	PD-1/PDL-1	3.93516	9	1
P-0004366	59	Female	Bladder Cancer	Combo	5.90273	9	0
P-0001268	62	Male	Bladder Cancer	PD-1/PDL-1	4.46097	9	1
P-0020122	64	Female	Bladder Cancer	PD-1/PDL-1	22.8206	9	0
P-0021484	65	Male	Bladder Cancer	PD-1/PDL-1	14.0434	9	0
P-0011187	69	Male	Bladder Cancer	PD-1/PDL-1	9.83789	9	1
P-0008532	71	Male	Bladder Cancer	PD-1/PDL-1	3.93516	9	1
P-0006270	73	Female	Bladder Cancer	PD-1/PDL-1	3.93516	9	1
P-0020592	75	Male	Bladder Cancer	PD-1/PDL-1	7.02172	9	0
P-0005998	44	Male	Colorectal Cancer	PD-1/PDL-1	3.93516	9	1
P-0001702	48	Female	Colorectal Cancer	PD-1/PDL-1	5.57622	9	1
P-0006587	51	Male	Colorectal Cancer	PD-1/PDL-1	10.8217	9	0
P-0004011	61	Male	Colorectal Cancer	PD-1/PDL-1	64.9301	9	0
P-0011068	62	Male	Colorectal Cancer	PD-1/PDL-1	43.2867	9	0
P-0020252	66	Female	Colorectal Cancer	PD-1/PDL-1	64.9509	9	0
P-0001867	70	Male	Colorectal Cancer	PD-1/PDL-1	14.4982	9	1
P-0008662	72	Female	Colorectal Cancer	PD-1/PDL-1	1.96758	9	0
P-0003456	45	Female	Glioma	PD-1/PDL-1	3.94	9	1
P-0010004	45	Female	Glioma	PD-1/PDL-1	3.94	9	1
P-0002181	48	Male	Glioma	PD-1/PDL-1	3.35	9	1
P-0009365	53	Female	Glioma	PD-1/PDL-1	4.92	9	1
P-0019226	29	Male	Head and Neck Cancer	PD-1/PDL-1	4.38857	9	0
P-0017769	39	Male	Head and Neck Cancer	PD-1/PDL-1	6.144	9	1
P-0020113	51	Male	Head and Neck Cancer	PD-1/PDL-1	2.63314	9	1
P-0020147	69	Male	Head and Neck Cancer	PD-1/PDL-1	5.26629	9	0
P-0000454	71	Male	Head and Neck Cancer	PD-1/PDL-1	2.23049	9	0
P-0006641	75	Female	Head and Neck Cancer	PD-1/PDL-1	4.91895	9	1
P-0006773	67	Female	Melanoma	PD-1/PDL-1	4.92	9	1
P-0007235	72	Female	Melanoma	Combo	8.85	9	1
P-0014137	78	Male	Melanoma	PD-1/PDL-1	25.58	9	0
P-0010065	40	Male	Non-Small Cell Lung Cancer	PD-1/PDL-1	1.97	9	0
P-0015531	54	Female	Non-Small Cell Lung Cancer	PD-1/PDL-1	5.27	9	1
P-0015785	57	Female	Non-Small Cell Lung Cancer	PD-1/PDL-1	22.82	9	1
P-0004961	68	Female	Non-Small Cell Lung Cancer	PD-1/PDL-1	0.98	9	1
P-0012729	69	Male	Non-Small Cell Lung Cancer	PD-1/PDL-1	6.89	9	1
P-0016185	73	Male	Non-Small Cell Lung Cancer	PD-1/PDL-1	6.14	9	1
P-0014269	75	Male	Non-Small Cell Lung Cancer	PD-1/PDL-1	0.88	9	1
P-0009483	82	Female	Non-Small Cell Lung Cancer	PD-1/PDL-1	9.84	9	1
P-0014172	83	Male	Non-Small Cell Lung Cancer	PD-1/PDL-1	18.69	9	1
P-0013240	56	Male	Renal Cell Carcinoma	PD-1/PDL-1	3.94	9	1
P-0010212	62	Male	Renal Cell Carcinoma	PD-1/PDL-1	3.94	9	0
P-0012102	62	Male	Renal Cell Carcinoma	PD-1/PDL-1	3.94	9	1
P-0013089	67	Female	Renal Cell Carcinoma	PD-1/PDL-1	5.9	9	1
P-0008718	52	Male	Bladder Cancer	PD-1/PDL-1	12.7893	8	0
P-0000184	60	Male	Bladder Cancer	PD-1/PDL-1	8.92195	8	0
P-0000222	64	Male	Bladder Cancer	PD-1/PDL-1	16.7287	8	1
P-0020835	65	Male	Bladder Cancer	PD-1/PDL-1	7.89943	8	0
P-0002575	69	Male	Bladder Cancer	Combo	7.80671	8	1
P-0021622	74	Male	Bladder Cancer	PD-1/PDL-1	7.89943	8	0
P-0023138	76	Male	Bladder Cancer	PD-1/PDL-1	11.4103	8	1
P-0005650	77	Male	Bladder Cancer	Combo	4.91895	8	1
P-0020121	79	Female	Bladder Cancer	PD-1/PDL-1	17.5543	8	0
P-0025888	80	Female	Bladder Cancer	PD-1/PDL-1	4.38857	8	0
P-0025313	83	Female	Bladder Cancer	PD-1/PDL-1	5.26629	8	0
P-0019949	28	Male	Colorectal Cancer	PD-1/PDL-1	38.6195	8	0
P-0002792	58	Male	Colorectal Cancer	PD-1/PDL-1	5.57622	8	0
P-0016522	59	Male	Colorectal Cancer	PD-1/PDL-1	44.7635	8	0
P-0013087	60	Male	Colorectal Cancer	Combo	6.88652	8	0
P-0017697	60	Female	Colorectal Cancer	PD-1/PDL-1	91.2824	8	1
P-0002015	44	Female	Glioma	PD-1/PDL-1	2.23	8	1
P-0015346	45	Female	Glioma	PD-1/PDL-1	2.63	8	0
P-0013243	47	Female	Glioma	PD-1/PDL-1	5.9	8	1
P-0005539	50	Female	Glioma	PD-1/PDL-1	2.95	8	1
P-0006441	57	Male	Glioma	PD-1/PDL-1	4.92	8	1
P-0013506	57	Female	Glioma	PD-1/PDL-1	57.06	8	0
P-0015573	59	Male	Glioma	PD-1/PDL-1	52.66	8	0
P-0001052	63	Female	Glioma	PD-1/PDL-1	5.58	8	1
P-0003272	29	Male	Head and Neck Cancer	PD-1/PDL-1	0.983789	8	1
P-0009588	35	Male	Head and Neck Cancer	PD-1/PDL-1	2.95137	8	1
P-0002469	55	Male	Head and Neck Cancer	PD-1/PDL-1	3.34573	8	1
P-0020649	63	Male	Head and Neck Cancer	PD-1/PDL-1	1.75543	8	0
P-0008033	66	Male	Head and Neck Cancer	PD-1/PDL-1	3.93516	8	1
P-0020156	67	Female	Head and Neck Cancer	PD-1/PDL-1	18.432	8	0
P-0013920	70	Male	Head and Neck Cancer	PD-1/PDL-1	9.83789	8	1
P-0008353	77	Male	Head and Neck Cancer	PD-1/PDL-1	24.5947	8	1
P-0013956	44	Female	Melanoma	PD-1/PDL-1	6.89	8	1
P-0009177	56	Female	Melanoma	Combo	7.87	8	1
P-0013596	58	Male	Melanoma	PD-1/PDL-1	11.81	8	1
P-0006177	62	Male	Melanoma	PD-1/PDL-1	43.29	8	1
P-0008659	65	Male	Melanoma	PD-1/PDL-1	8.85	8	1
P-0008784	70	Female	Melanoma	PD-1/PDL-1	8.85	8	1
P-0004495	40	Male	Non-Small Cell Lung Cancer	PD-1/PDL-1	8.85	8	1
P-0003782	57	Male	Non-Small Cell Lung Cancer	PD-1/PDL-1	2.95	8	1
P-0002320	57	Male	Non-Small Cell Lung Cancer	PD-1/PDL-1	6.69	8	1
P-0007278	57	Female	Non-Small Cell Lung Cancer	PD-1/PDL-1	7.87	8	1
P-0014451	65	Female	Non-Small Cell Lung Cancer	PD-1/PDL-1	9.65	8	1
P-0011535	73	Female	Non-Small Cell Lung Cancer	PD-1/PDL-1	2.95	8	1
P-0009020	74	Female	Non-Small Cell Lung Cancer	PD-1/PDL-1	12.79	8	1
P-0007420	85	Female	Non-Small Cell Lung Cancer	PD-1/PDL-1	3.94	8	1
P-0004561	63	Male	Renal Cell Carcinoma	PD-1/PDL-1	6.89	8	1
P-0003051	46	Male	Bladder Cancer	Combo	10.8217	7	1
P-0007484	51	Female	Bladder Cancer	PD-1/PDL-1	5.90273	7	0
P-0019771	55	Female	Bladder Cancer	PD-1/PDL-1	7.02172	7	0
P-0010826	60	Male	Bladder Cancer	PD-1/PDL-1	4.91895	7	0
P-0013861	61	Male	Bladder Cancer	PD-1/PDL-1	2.95137	7	0
P-0013873	61	Male	Bladder Cancer	PD-1/PDL-1	4.91895	7	1
P-0014815	61	Female	Bladder Cancer	PD-1/PDL-1	6.144	7	1
P-0016149	65	Male	Bladder Cancer	Combo	16.6766	7	0
P-0005266	68	Male	Bladder Cancer	PD-1/PDL-1	5.90273	7	0
P-0008425	69	Male	Bladder Cancer	PD-1/PDL-1	6.88652	7	1
P-0017599	72	Male	Bladder Cancer	PD-1/PDL-1	6.88652	7	1
P-0021503	73	Male	Bladder Cancer	PD-1/PDL-1	21.9429	7	1
P-0016915	79	Male	Bladder Cancer	PD-1/PDL-1	10.5326	7	0
P-0021532	79	Female	Bladder Cancer	PD-1/PDL-1	14.0434	7	0
P-0006800	80	Male	Bladder Cancer	PD-1/PDL-1	8.8541	7	1
P-0003365	47	Male	Colorectal Cancer	PD-1/PDL-1	1.96758	7	1
P-0002042	47	Male	Colorectal Cancer	PD-1/PDL-1	11.1524	7	1
P-0019267	50	Female	Colorectal Cancer	PD-1/PDL-1	5.26629	7	0
P-0019710	56	Male	Colorectal Cancer	PD-1/PDL-1	7.02172	7	1
P-0007567	56	Male	Colorectal Cancer	Combo	7.87031	7	0
P-0012728	61	Female	Colorectal Cancer	PD-1/PDL-1	9.83789	7	1
P-0004140	62	Male	Colorectal Cancer	PD-1/PDL-1	10.8217	7	1
P-0004256	33	Male	Glioma	PD-1/PDL-1	3.94	7	1
P-0006672	45	Male	Glioma	PD-1/PDL-1	5.9	7	1
P-0001843	63	Female	Glioma	PD-1/PDL-1	5.58	7	0
P-0009453	64	Female	Glioma	PD-1/PDL-1	3.94	7	1
P-0000621	44	Male	Head and Neck Cancer	PD-1/PDL-1	5.57622	7	1
P-0010816	51	Male	Head and Neck Cancer	PD-1/PDL-1	7.87031	7	1
P-0006008	63	Male	Head and Neck Cancer	PD-1/PDL-1	9.83789	7	1
P-0021915	65	Male	Head and Neck Cancer	PD-1/PDL-1	7.02172	7	1
P-0014060	66	Female	Head and Neck Cancer	PD-1/PDL-1	5.90273	7	0
P-0005869	68	Male	Head and Neck Cancer	PD-1/PDL-1	1.96758	7	1
P-0010174	68	Male	Head and Neck Cancer	PD-1/PDL-1	11.8055	7	0
P-0016191	78	Male	Head and Neck Cancer	PD-1/PDL-1	8.77715	7	0
P-0005157	25	Male	Melanoma	Combo	3.94	7	1
P-0003921	47	Male	Melanoma	Combo	15.74	7	0
P-0002765	53	Male	Melanoma	CTLA4	5.58	7	1
P-0002429	65	Male	Melanoma	CTLA4	4.46	7	1
P-0001485	71	Male	Melanoma	CTLA4	76.95	7	1
P-0009311	73	Female	Melanoma	Combo	31.48	7	1
P-0003069	75	Female	Melanoma	CTLA4	35.42	7	1
P-0002019	80	Male	Melanoma	PD-1/PDL-1	1.12	7	0
P-0006114	54	Female	Non-Small Cell Lung Cancer	PD-1/PDL-1	2.95	7	1
P-0000978	58	Female	Non-Small Cell Lung Cancer	PD-1/PDL-1	1.12	7	1
P-0009915	59	Male	Non-Small Cell Lung Cancer	PD-1/PDL-1	7.87	7	1
P-0011180	61	Female	Non-Small Cell Lung Cancer	PD-1/PDL-1	1.97	7	0
P-0006674	66	Female	Non-Small Cell Lung Cancer	PD-1/PDL-1	16.72	7	1
P-0012427	67	Male	Non-Small Cell Lung Cancer	PD-1/PDL-1	5.9	7	1
P-0003132	67	Female	Non-Small Cell Lung Cancer	PD-1/PDL-1	33.45	7	1
P-0007583	70	Female	Non-Small Cell Lung Cancer	PD-1/PDL-1	13.77	7	1
P-0011559	73	Male	Non-Small Cell Lung Cancer	PD-1/PDL-1	3.94	7	1
P-0009080	74	Male	Non-Small Cell Lung Cancer	PD-1/PDL-1	5.9	7	1
P-0010855	74	Female	Non-Small Cell Lung Cancer	PD-1/PDL-1	6.89	7	1
P-0009274	77	Female	Non-Small Cell Lung Cancer	Combo	3.94	7	1
P-0004077	36	Female	Renal Cell Carcinoma	Combo	1.97	7	1
P-0004294	54	Male	Renal Cell Carcinoma	PD-1/PDL-1	3.94	7	1
P-0005641	76	Male	Renal Cell Carcinoma	PD-1/PDL-1	1.97	7	1
P-0022520	48	Male	Bladder Cancer	PD-1/PDL-1	70.2172	6	0
P-0010094	54	Male	Bladder Cancer	PD-1/PDL-1	3.93516	6	1
P-0007274	55	Male	Bladder Cancer	PD-1/PDL-1	2.95137	6	0
P-0014507	56	Female	Bladder Cancer	Combo	8.77715	6	0
P-0019036	58	Male	Bladder Cancer	PD-1/PDL-1	6.144	6	0
P-0023425	58	Male	Bladder Cancer	PD-1/PDL-1	12.288	6	1
P-0015344	61	Male	Bladder Cancer	PD-1/PDL-1	58.8069	6	0
P-0025174	64	Female	Bladder Cancer	PD-1/PDL-1	4.38857	6	0
P-0004056	65	Male	Bladder Cancer	PD-1/PDL-1	14.7568	6	1
P-0021471	66	Female	Bladder Cancer	PD-1/PDL-1	6.144	6	0
P-0015965	70	Female	Bladder Cancer	PD-1/PDL-1	3.51086	6	1
P-0000746	72	Male	Bladder Cancer	PD-1/PDL-1	15.6134	6	1
P-0017472	80	Male	Bladder Cancer	PD-1/PDL-1	21.9429	6	0
P-0004257	81	Female	Bladder Cancer	PD-1/PDL-1	9.83789	6	0
P-0025079	82	Male	Bladder Cancer	PD-1/PDL-1	3.51086	6	0
P-0008439	82	Female	Bladder Cancer	PD-1/PDL-1	19.6758	6	1
P-0004387	85	Male	Bladder Cancer	PD-1/PDL-1	2.95137	6	1
P-0002730	50	Male	Colorectal Cancer	PD-1/PDL-1	4.46097	6	1
P-0021304	50	Male	Colorectal Cancer	PD-1/PDL-1	85.1384	6	0
P-0004803	59	Male	Colorectal Cancer	PD-1/PDL-1	7.87031	6	0
P-0017766	66	Male	Colorectal Cancer	Combo	7.89943	6	0
P-0003598	48	Female	Glioma	PD-1/PDL-1	1.97	6	1
P-0003865	55	Female	Glioma	PD-1/PDL-1	7.87	6	1
P-0002452	57	Female	Glioma	PD-1/PDL-1	2.23	6	1
P-0014071	66	Male	Glioma	PD-1/PDL-1	5.9	6	1
P-0014099	77	Female	Glioma	PD-1/PDL-1	3.94	6	1
P-0008169	53	Female	Head and Neck Cancer	PD-1/PDL-1	6.88652	6	1
P-0001538	54	Male	Head and Neck Cancer	PD-1/PDL-1	5.57622	6	1
P-0022502	62	Male	Head and Neck Cancer	PD-1/PDL-1	12.288	6	0
P-0002787	63	Male	Head and Neck Cancer	PD-1/PDL-1	5.57622	6	0
P-0001186	69	Male	Head and Neck Cancer	PD-1/PDL-1	1.11524	6	1
P-0002603	76	Male	Head and Neck Cancer	PD-1/PDL-1	1.11524	6	0
P-0001179	50	Female	Melanoma	PD-1/PDL-1	3.35	6	1
P-0008999	53	Male	Melanoma	Combo	11.81	6	1
P-0002422	76	Female	Melanoma	PD-1/PDL-1	2.23	6	1
P-0007281	82	Male	Melanoma	PD-1/PDL-1	11.81	6	1
P-0001955	31	Female	Non-Small Cell Lung Cancer	PD-1/PDL-1	2.23	6	1
P-0000563	42	Male	Non-Small Cell Lung Cancer	PD-1/PDL-1	3.35	6	1
P-0005711	47	Male	Non-Small Cell Lung Cancer	PD-1/PDL-1	2.95	6	1
P-0007978	50	Female	Non-Small Cell Lung Cancer	PD-1/PDL-1	10.82	6	1
P-0001836	60	Female	Non-Small Cell Lung Cancer	PD-1/PDL-1	24.54	6	0
P-0016481	62	Male	Non-Small Cell Lung Cancer	PD-1/PDL-1	20.19	6	1
P-0007068	65	Male	Non-Small Cell Lung Cancer	PD-1/PDL-1	8.85	6	1
P-0014786	65	Female	Non-Small Cell Lung Cancer	PD-1/PDL-1	11.41	6	1
P-0002766	66	Female	Non-Small Cell Lung Cancer	PD-1/PDL-1	5.58	6	1
P-0002160	67	Male	Non-Small Cell Lung Cancer	PD-1/PDL-1	13.38	6	1
P-0002551	67	Female	Non-Small Cell Lung Cancer	PD-1/PDL-1	17.84	6	0
P-0015984	67	Female	Non-Small Cell Lung Cancer	PD-1/PDL-1	24.58	6	1
P-0011499	71	Female	Non-Small Cell Lung Cancer	PD-1/PDL-1	7.87	6	1
P-0014562	71	Male	Non-Small Cell Lung Cancer	PD-1/PDL-1	12.29	6	0
P-0002905	73	Male	Non-Small Cell Lung Cancer	PD-1/PDL-1	5.58	6	1
P-0007101	76	Male	Non-Small Cell Lung Cancer	PD-1/PDL-1	11.81	6	1
P-0013335	48	Male	Renal Cell Carcinoma	PD-1/PDL-1	1.97	6	1
P-0006095	65	Male	Renal Cell Carcinoma	PD-1/PDL-1	5.9	6	1
P-0014418	46	Male	Bladder Cancer	PD-1/PDL-1	14.9212	5	1
P-0003814	50	Female	Bladder Cancer	PD-1/PDL-1	2.95137	5	0
P-0020995	63	Male	Bladder Cancer	Combo	6.144	5	1
P-0021255	65	Male	Bladder Cancer	PD-1/PDL-1	15.7989	5	0
P-0009910	70	Female	Bladder Cancer	PD-1/PDL-1	14.7568	5	1
P-0018229	71	Female	Bladder Cancer	PD-1/PDL-1	4.38857	5	0
P-0013304	72	Male	Bladder Cancer	PD-1/PDL-1	0.983789	5	1
P-0015663	75	Female	Bladder Cancer	Combo	6.144	5	0
P-0021004	81	Male	Bladder Cancer	PD-1/PDL-1	5.26629	5	0
P-0011195	38	Female	Colorectal Cancer	PD-1/PDL-1	2.95137	5	1
P-0018580	41	Female	Colorectal Cancer	PD-1/PDL-1	4.38857	5	1
P-0022977	48	Female	Colorectal Cancer	PD-1/PDL-1	2.63314	5	0
P-0006213	50	Male	Colorectal Cancer	PD-1/PDL-1	8.8541	5	1
P-0012708	52	Female	Colorectal Cancer	Combo	4.91895	5	0
P-0015851	58	Male	Colorectal Cancer	PD-1/PDL-1	30.72	5	0
P-0007771	59	Female	Colorectal Cancer	PD-1/PDL-1	4.91895	5	1
P-0019428	70	Female	Colorectal Cancer	PD-1/PDL-1	46.5189	5	0
P-0007495	81	Male	Colorectal Cancer	PD-1/PDL-1	13.773	5	0
P-0007010	17	Male	Glioma	PD-1/PDL-1	0.98	5	1
P-0009499	36	Male	Glioma	PD-1/PDL-1	51.16	5	1
P-0010744	52	Female	Glioma	PD-1/PDL-1	100.35	5	0
P-0016256	55	Male	Glioma	PD-1/PDL-1	4.39	5	1
P-0005882	56	Male	Glioma	PD-1/PDL-1	2.95	5	1
P-0005254	57	Female	Glioma	PD-1/PDL-1	1.97	5	1
P-0006500	57	Male	Glioma	PD-1/PDL-1	5.9	5	1
P-0006667	58	Male	Glioma	PD-1/PDL-1	3.94	5	1
P-0010380	74	Male	Glioma	PD-1/PDL-1	6.89	5	1
P-0003711	51	Male	Head and Neck Cancer	PD-1/PDL-1	6.88652	5	1
P-0007925	55	Male	Head and Neck Cancer	Combo	4.91895	5	1
P-0023557	58	Male	Head and Neck Cancer	PD-1/PDL-1	6.144	5	0
P-0008800	59	Male	Head and Neck Cancer	PD-1/PDL-1	2.95137	5	1
P-0008528	66	Male	Head and Neck Cancer	Combo	8.8541	5	1
P-0016835	68	Female	Head and Neck Cancer	PD-1/PDL-1	6.144	5	0
P-0019407	77	Male	Head and Neck Cancer	PD-1/PDL-1	12.288	5	1
P-0006109	59	Female	Melanoma	CTLA4	0.98	5	0
P-0001669	60	Male	Melanoma	CTLA4	1.12	5	1
P-0004686	61	Female	Melanoma	PD-1/PDL-1	2.95	5	1
P-0015415	66	Male	Melanoma	Combo	79.87	5	1
P-0014556	83	Male	Melanoma	PD-1/PDL-1	17.55	5	1
P-0005897	44	Male	Non-Small Cell Lung Cancer	PD-1/PDL-1	5.9	5	1
P-0001665	48	Female	Non-Small Cell Lung Cancer	PD-1/PDL-1	1.12	5	1
P-0013656	55	Female	Non-Small Cell Lung Cancer	PD-1/PDL-1	3.94	5	1
P-0009476	58	Female	Non-Small Cell Lung Cancer	PD-1/PDL-1	7.87	5	1
P-0009714	60	Male	Non-Small Cell Lung Cancer	PD-1/PDL-1	19.68	5	1
P-0003628	63	Male	Non-Small Cell Lung Cancer	PD-1/PDL-1	12.79	5	1
P-0000458	66	Male	Non-Small Cell Lung Cancer	PD-1/PDL-1	1.12	5	1
P-0005289	68	Male	Non-Small Cell Lung Cancer	PD-1/PDL-1	9.84	5	1
P-0009526	69	Male	Non-Small Cell Lung Cancer	PD-1/PDL-1	11.81	5	1
P-0007597	73	Male	Non-Small Cell Lung Cancer	PD-1/PDL-1	15.74	5	1
P-0014772	74	Female	Non-Small Cell Lung Cancer	PD-1/PDL-1	8.78	5	1
P-0008935	75	Female	Non-Small Cell Lung Cancer	PD-1/PDL-1	10.82	5	1
P-0008848	76	Male	Non-Small Cell Lung Cancer	PD-1/PDL-1	5.9	5	1
P-0003034	80	Male	Non-Small Cell Lung Cancer	PD-1/PDL-1	13.77	5	1
P-0005629	81	Female	Non-Small Cell Lung Cancer	PD-1/PDL-1	5.9	5	1
P-0012323	47	Female	Renal Cell Carcinoma	PD-1/PDL-1	4.92	5	1
P-0008340	50	Female	Renal Cell Carcinoma	PD-1/PDL-1	3.94	5	1
P-0011246	63	Female	Renal Cell Carcinoma	Combo	2.95	5	0
P-0012040	66	Male	Renal Cell Carcinoma	PD-1/PDL-1	3.94	5	1
P-0019101	52	Female	Bladder Cancer	PD-1/PDL-1	16.6766	4	0
P-0025120	59	Female	Bladder Cancer	PD-1/PDL-1	4.38857	4	0
P-0021848	60	Male	Bladder Cancer	PD-1/PDL-1	5.26629	4	1
P-0002748	60	Male	Bladder Cancer	PD-1/PDL-1	17.7082	4	1
P-0026970	62	Male	Bladder Cancer	PD-1/PDL-1	27.2092	4	0
P-0011245	64	Male	Bladder Cancer	PD-1/PDL-1	1.96758	4	1
P-0014909	67	Male	Bladder Cancer	PD-1/PDL-1	6.144	4	1
P-0003596	67	Male	Bladder Cancer	PD-1/PDL-1	12.7893	4	1
P-0017241	71	Male	Bladder Cancer	PD-1/PDL-1	5.26629	4	1
P-0025827	71	Male	Bladder Cancer	PD-1/PDL-1	8.77715	4	0
P-0016925	71	Male	Bladder Cancer	PD-1/PDL-1	24.576	4	1
P-0009005	72	Male	Bladder Cancer	PD-1/PDL-1	11.8055	4	1
P-0004240	76	Female	Bladder Cancer	Combo	5.90273	4	1
P-0008168	78	Male	Bladder Cancer	PD-1/PDL-1	6.88652	4	0
P-0011144	26	Female	Colorectal Cancer	PD-1/PDL-1	4.91895	4	1
P-0005634	34	Male	Colorectal Cancer	CTLA4	8.8541	4	1
P-0006708	34	Female	Colorectal Cancer	PD-1/PDL-1	9.83789	4	1
P-0010966	48	Male	Colorectal Cancer	PD-1/PDL-1	3.93516	4	0
P-0000721	59	Female	Colorectal Cancer	PD-1/PDL-1	8.92195	4	1
P-0009363	63	Female	Colorectal Cancer	PD-1/PDL-1	6.88652	4	1
P-0011288	71	Female	Colorectal Cancer	Combo	10.8217	4	0
P-0003319	15	Male	Glioma	PD-1/PDL-1	0.98	4	1
P-0006545	25	Male	Glioma	PD-1/PDL-1	4.92	4	1
P-0002647	42	Male	Glioma	PD-1/PDL-1	4.46	4	1
P-0001408	55	Male	Glioma	Combo	4.46	4	0
P-0013294	57	Female	Glioma	PD-1/PDL-1	3.94	4	1
P-0001420	57	Female	Glioma	PD-1/PDL-1	40.15	4	1
P-0020965	60	Male	Head and Neck Cancer	PD-1/PDL-1	4.38857	4	1
P-0018188	61	Female	Head and Neck Cancer	PD-1/PDL-1	7.89943	4	1
P-0001794	63	Male	Head and Neck Cancer	PD-1/PDL-1	3.34573	4	1
P-0007575	65	Male	Head and Neck Cancer	PD-1/PDL-1	5.90273	4	1
P-0010222	72	Male	Head and Neck Cancer	PD-1/PDL-1	2.95137	4	1
P-0023948	75	Male	Head and Neck Cancer	PD-1/PDL-1	14.9212	4	0
P-0010588	80	Female	Head and Neck Cancer	PD-1/PDL-1	5.90273	4	1
P-0002018	36	Female	Melanoma	Combo	6.69	4	1
P-0009180	41	Female	Melanoma	Combo	1.97	4	1
P-0012529	48	Male	Melanoma	PD-1/PDL-1	11.81	4	1
P-0007927	60	Male	Melanoma	PD-1/PDL-1	0.98	4	1
P-0001679	69	Male	Melanoma	CTLA4	5.58	4	1
P-0007517	73	Male	Melanoma	Combo	7.87	4	1
P-0006155	83	Male	Melanoma	PD-1/PDL-1	74.77	4	0
P-0003871	84	Male	Melanoma	PD-1/PDL-1	91.49	4	0
P-0001892	86	Male	Melanoma	CTLA4	4.46	4	1
P-0008974	86	Male	Melanoma	PD-1/PDL-1	36.4	4	1
P-0002646	43	Male	Non-Small Cell Lung Cancer	PD-1/PDL-1	6.69	4	1
P-0011036	56	Male	Non-Small Cell Lung Cancer	PD-1/PDL-1	11.81	4	1
P-0016614	60	Female	Non-Small Cell Lung Cancer	PD-1/PDL-1	7.9	4	1
P-0004054	61	Male	Non-Small Cell Lung Cancer	PD-1/PDL-1	13.77	4	1
P-0002826	61	Female	Non-Small Cell Lung Cancer	PD-1/PDL-1	14.5	4	1
P-0001437	65	Female	Non-Small Cell Lung Cancer	PD-1/PDL-1	1.12	4	1
P-0003964	72	Male	Non-Small Cell Lung Cancer	PD-1/PDL-1	10.04	4	1
P-0004612	74	Male	Non-Small Cell Lung Cancer	PD-1/PDL-1	3.94	4	1
P-0016646	77	Male	Non-Small Cell Lung Cancer	PD-1/PDL-1	9.65	4	1
P-0014207	79	Male	Non-Small Cell Lung Cancer	PD-1/PDL-1	7.02	4	1
P-0001977	80	Male	Non-Small Cell Lung Cancer	PD-1/PDL-1	10.04	4	1
P-0012993	87	Male	Non-Small Cell Lung Cancer	PD-1/PDL-1	5.9	4	1
P-0005822	58	Female	Renal Cell Carcinoma	PD-1/PDL-1	2.95	4	1
P-0007210	68	Female	Renal Cell Carcinoma	PD-1/PDL-1	3.94	4	1
P-0016402	42	Male	Bladder Cancer	PD-1/PDL-1	1.75543	3	1
P-0010254	51	Female	Bladder Cancer	PD-1/PDL-1	1.96758	3	1
P-0008816	52	Female	Bladder Cancer	PD-1/PDL-1	0.983789	3	1
P-0005054	61	Female	Bladder Cancer	PD-1/PDL-1	20.6596	3	0
P-0001223	63	Male	Bladder Cancer	Combo	8.92195	3	1
P-0017208	66	Male	Bladder Cancer	PD-1/PDL-1	17.5543	3	1
P-0003000	69	Male	Bladder Cancer	PD-1/PDL-1	6.69146	3	1
P-0003911	70	Female	Bladder Cancer	PD-1/PDL-1	4.91895	3	1
P-0024263	70	Male	Bladder Cancer	PD-1/PDL-1	7.02172	3	0
P-0018028	72	Male	Bladder Cancer	PD-1/PDL-1	8.77715	3	1
P-0024795	72	Female	Bladder Cancer	PD-1/PDL-1	12.288	3	0
P-0027346	76	Male	Bladder Cancer	PD-1/PDL-1	6.144	3	0
P-0017658	76	Male	Bladder Cancer	PD-1/PDL-1	10.8217	3	0
P-0015186	76	Female	Bladder Cancer	PD-1/PDL-1	12.288	3	1
P-0011439	76	Male	Bladder Cancer	PD-1/PDL-1	22.6271	3	1
P-0012037	77	Male	Bladder Cancer	PD-1/PDL-1	5.90273	3	1
P-0001578	78	Male	Bladder Cancer	PD-1/PDL-1	12.2677	3	1
P-0018541	79	Male	Bladder Cancer	PD-1/PDL-1	8.77715	3	0
P-0022068	83	Female	Bladder Cancer	PD-1/PDL-1	7.02172	3	0
P-0026892	89	Male	Bladder Cancer	PD-1/PDL-1	6.144	3	0
P-0002653	19	Female	Colorectal Cancer	PD-1/PDL-1	2.23049	3	1
P-0014010	36	Female	Colorectal Cancer	PD-1/PDL-1	6.88652	3	1
P-0003285	37	Female	Colorectal Cancer	PD-1/PDL-1	4.91895	3	0
P-0000699	43	Male	Colorectal Cancer	Combo	5.57622	3	0
P-0007081	49	Male	Colorectal Cancer	PD-1/PDL-1	2.95137	3	1
P-0024824	55	Male	Colorectal Cancer	PD-1/PDL-1	10.5326	3	0
P-0016314	63	Female	Colorectal Cancer	PD-1/PDL-1	112.348	3	1
P-0025532	68	Female	Colorectal Cancer	PD-1/PDL-1	41.2526	3	0
P-0005963	15	Male	Glioma	PD-1/PDL-1	2.95	3	1
P-0001400	34	Female	Glioma	PD-1/PDL-1	5.58	3	1
P-0013029	42	Male	Glioma	PD-1/PDL-1	30.5	3	1
P-0001406	65	Female	Glioma	PD-1/PDL-1	3.35	3	1
P-0010613	75	Female	Glioma	PD-1/PDL-1	9.84	3	0
P-0010104	34	Male	Head and Neck Cancer	PD-1/PDL-1	4.91895	3	1
P-0008798	41	Male	Head and Neck Cancer	PD-1/PDL-1	0.983789	3	1
P-0025544	52	Male	Head and Neck Cancer	PD-1/PDL-1	8.77715	3	0
P-0019240	59	Male	Head and Neck Cancer	PD-1/PDL-1	1.75543	3	1
P-0009969	59	Male	Head and Neck Cancer	PD-1/PDL-1	3.93516	3	0
P-0013652	59	Male	Head and Neck Cancer	PD-1/PDL-1	9.83789	3	1
P-0020846	62	Male	Head and Neck Cancer	PD-1/PDL-1	5.26629	3	1
P-0019258	62	Male	Head and Neck Cancer	PD-1/PDL-1	7.02172	3	1
P-0024576	62	Male	Head and Neck Cancer	PD-1/PDL-1	9.65486	3	0
P-0012883	63	Male	Head and Neck Cancer	PD-1/PDL-1	15.7406	3	0
P-0026282	67	Male	Head and Neck Cancer	PD-1/PDL-1	2.63314	3	0
P-0024866	68	Male	Head and Neck Cancer	PD-1/PDL-1	59.6846	3	0
P-0022441	70	Female	Head and Neck Cancer	PD-1/PDL-1	11.4103	3	0
P-0023015	75	Male	Head and Neck Cancer	PD-1/PDL-1	7.02172	3	0
P-0007970	55	Male	Melanoma	Combo	11.81	3	0
P-0001841	62	Male	Melanoma	Combo	8.92	3	1
P-0003899	68	Male	Melanoma	PD-1/PDL-1	1.97	3	0
P-0004272	77	Male	Melanoma	PD-1/PDL-1	10.82	3	1
P-0016197	83	Male	Melanoma	PD-1/PDL-1	28.09	3	1
P-0009469	32	Female	Non-Small Cell Lung Cancer	PD-1/PDL-1	2.95	3	0
P-0010645	53	Male	Non-Small Cell Lung Cancer	PD-1/PDL-1	3.94	3	1
P-0002874	55	Female	Non-Small Cell Lung Cancer	PD-1/PDL-1	14.5	3	1
P-0010362	60	Female	Non-Small Cell Lung Cancer	PD-1/PDL-1	2.95	3	1
P-0008765	60	Male	Non-Small Cell Lung Cancer	PD-1/PDL-1	6.89	3	0
P-0004099	61	Male	Non-Small Cell Lung Cancer	PD-1/PDL-1	12.79	3	1
P-0016782	61	Female	Non-Small Cell Lung Cancer	PD-1/PDL-1	21.94	3	0
P-0011546	62	Female	Non-Small Cell Lung Cancer	PD-1/PDL-1	9.84	3	0
P-0009505	63	Female	Non-Small Cell Lung Cancer	PD-1/PDL-1	2.95	3	1
P-0003157	63	Male	Non-Small Cell Lung Cancer	PD-1/PDL-1	5.9	3	1
P-0008851	63	Male	Non-Small Cell Lung Cancer	PD-1/PDL-1	7.87	3	1
P-0006954	67	Female	Non-Small Cell Lung Cancer	PD-1/PDL-1	7.87	3	1
P-0001832	68	Female	Non-Small Cell Lung Cancer	PD-1/PDL-1	4.46	3	1
P-0006993	68	Male	Non-Small Cell Lung Cancer	PD-1/PDL-1	7.87	3	1
P-0014513	69	Female	Non-Small Cell Lung Cancer	PD-1/PDL-1	2.63	3	0
P-0002279	70	Female	Non-Small Cell Lung Cancer	PD-1/PDL-1	6.69	3	1
P-0007977	70	Female	Non-Small Cell Lung Cancer	PD-1/PDL-1	6.89	3	1
P-0012341	72	Female	Non-Small Cell Lung Cancer	PD-1/PDL-1	5.9	3	1
P-0011012	74	Male	Non-Small Cell Lung Cancer	PD-1/PDL-1	3.94	3	1
P-0010215	74	Female	Non-Small Cell Lung Cancer	PD-1/PDL-1	6.89	3	1
P-0000235	76	Male	Non-Small Cell Lung Cancer	PD-1/PDL-1	8.92	3	1
P-0006728	76	Female	Non-Small Cell Lung Cancer	PD-1/PDL-1	13.77	3	1
P-0010013	77	Male	Non-Small Cell Lung Cancer	PD-1/PDL-1	1.97	3	1
P-0011244	77	Male	Non-Small Cell Lung Cancer	PD-1/PDL-1	2.95	3	1
P-0008161	82	Male	Non-Small Cell Lung Cancer	PD-1/PDL-1	4.92	3	0
P-0007582	83	Male	Non-Small Cell Lung Cancer	PD-1/PDL-1	4.92	3	1
P-0010963	61	Male	Renal Cell Carcinoma	PD-1/PDL-1	0.98	3	1
P-0006282	61	Male	Renal Cell Carcinoma	PD-1/PDL-1	2.95	3	1
P-0003645	77	Male	Renal Cell Carcinoma	PD-1/PDL-1	4.92	3	1
P-0013283	49	Male	Bladder Cancer	PD-1/PDL-1	6.88652	2	1
P-0022034	51	Male	Bladder Cancer	PD-1/PDL-1	0.877715	2	1
P-0002614	58	Male	Bladder Cancer	PD-1/PDL-1	7.80671	2	1
P-0001871	60	Female	Bladder Cancer	PD-1/PDL-1	5.57622	2	1
P-0011440	62	Male	Bladder Cancer	PD-1/PDL-1	27.5461	2	1
P-0005947	62	Female	Bladder Cancer	PD-1/PDL-1	28.5299	2	0
P-0014402	67	Female	Bladder Cancer	PD-1/PDL-1	8.77715	2	1
P-0017712	70	Male	Bladder Cancer	PD-1/PDL-1	8.77715	2	1
P-0020167	71	Male	Bladder Cancer	PD-1/PDL-1	4.38857	2	1
P-0003024	74	Male	Bladder Cancer	Combo	34.5726	2	1
P-0023450	83	Male	Bladder Cancer	PD-1/PDL-1	17.5543	2	0
P-0017986	33	Female	Colorectal Cancer	PD-1/PDL-1	61.44	2	0
P-0006743	34	Female	Colorectal Cancer	PD-1/PDL-1	5.90273	2	0
P-0002855	45	Female	Colorectal Cancer	Combo	5.57622	2	1
P-0013354	53	Female	Colorectal Cancer	PD-1/PDL-1	4.91895	2	1
P-0001693	53	Female	Colorectal Cancer	PD-1/PDL-1	10.0372	2	1
P-0007486	55	Female	Colorectal Cancer	PD-1/PDL-1	5.90273	2	1
P-0023731	56	Female	Colorectal Cancer	PD-1/PDL-1	6.144	2	0
P-0011071	60	Male	Colorectal Cancer	PD-1/PDL-1	80.6707	2	1
P-0010499	65	Male	Colorectal Cancer	PD-1/PDL-1	153.471	2	1
P-0014182	66	Male	Colorectal Cancer	PD-1/PDL-1	7.89943	2	0
P-0001807	71	Male	Colorectal Cancer	PD-1/PDL-1	5.57622	2	1
P-0017263	74	Male	Colorectal Cancer	PD-1/PDL-1	3.51086	2	0
P-0006428	21	Female	Glioma	PD-1/PDL-1	7.87	2	1
P-0000223	29	Female	Glioma	PD-1/PDL-1	5.58	2	1
P-0007124	41	Male	Glioma	PD-1/PDL-1	4.92	2	1
P-0004259	47	Male	Glioma	PD-1/PDL-1	5.9	2	1
P-0010344	52	Male	Glioma	PD-1/PDL-1	3.94	2	1
P-0008258	57	Female	Glioma	PD-1/PDL-1	3.94	2	1
P-0014465	34	Male	Head and Neck Cancer	PD-1/PDL-1	8.77715	2	0
P-0008248	41	Male	Head and Neck Cancer	PD-1/PDL-1	12.7893	2	1
P-0019540	46	Male	Head and Neck Cancer	PD-1/PDL-1	7.02172	2	1
P-0024386	51	Male	Head and Neck Cancer	PD-1/PDL-1	7.02172	2	0
P-0014898	53	Male	Head and Neck Cancer	PD-1/PDL-1	5.26629	2	1
P-0007622	53	Male	Head and Neck Cancer	Combo	5.90273	2	1
P-0002745	55	Female	Head and Neck Cancer	PD-1/PDL-1	3.34573	2	1
P-0023749	55	Male	Head and Neck Cancer	PD-1/PDL-1	7.02172	2	0
P-0012189	59	Female	Head and Neck Cancer	PD-1/PDL-1	8.8541	2	1
P-0006439	60	Male	Head and Neck Cancer	PD-1/PDL-1	4.91895	2	0
P-0025720	61	Male	Head and Neck Cancer	PD-1/PDL-1	6.144	2	0
P-0010755	62	Male	Head and Neck Cancer	PD-1/PDL-1	1.96758	2	1
P-0006525	66	Female	Head and Neck Cancer	PD-1/PDL-1	3.93516	2	1
P-0020146	67	Female	Head and Neck Cancer	PD-1/PDL-1	11.4103	2	1
P-0017508	68	Female	Head and Neck Cancer	PD-1/PDL-1	5.26629	2	1
P-0018925	69	Male	Head and Neck Cancer	PD-1/PDL-1	17.5543	2	1
P-0008518	73	Male	Head and Neck Cancer	PD-1/PDL-1	0.983789	2	1
P-0008036	79	Female	Head and Neck Cancer	Combo	3.93516	2	1
P-0003197	55	Male	Melanoma	CTLA4	1.97	2	1
P-0014159	61	Male	Melanoma	PD-1/PDL-1	19.68	2	1
P-0010008	67	Male	Melanoma	Combo	5.9	2	1
P-0003255	69	Male	Melanoma	Combo	10.82	2	1
P-0010495	71	Female	Melanoma	PD-1/PDL-1	4.92	2	1
P-0015122	75	Female	Melanoma	PD-1/PDL-1	10.53	2	0
P-0006193	82	Female	Melanoma	Combo	10.82	2	1
P-0004815	85	Male	Melanoma	PD-1/PDL-1	3.94	2	1
P-0010891	42	Female	Non-Small Cell Lung Cancer	Combo	0.98	2	1
P-0000628	52	Male	Non-Small Cell Lung Cancer	PD-1/PDL-1	4.46	2	1
P-0010986	55	Female	Non-Small Cell Lung Cancer	PD-1/PDL-1	7.87	2	1
P-0010840	55	Female	Non-Small Cell Lung Cancer	PD-1/PDL-1	10.82	2	1
P-0000205	56	Female	Non-Small Cell Lung Cancer	Combo	5.58	2	1
P-0002969	56	Male	Non-Small Cell Lung Cancer	PD-1/PDL-1	22.3	2	1
P-0004117	57	Male	Non-Small Cell Lung Cancer	PD-1/PDL-1	3.94	2	1
P-0003635	57	Female	Non-Small Cell Lung Cancer	Combo	6.89	2	1
P-0009532	59	Male	Non-Small Cell Lung Cancer	PD-1/PDL-1	10.82	2	1
P-0004759	63	Female	Non-Small Cell Lung Cancer	PD-1/PDL-1	1.97	2	1
P-0002758	63	Male	Non-Small Cell Lung Cancer	PD-1/PDL-1	34.57	2	1
P-0001144	64	Male	Non-Small Cell Lung Cancer	PD-1/PDL-1	6.69	2	1
P-0007525	65	Female	Non-Small Cell Lung Cancer	PD-1/PDL-1	3.94	2	1
P-0012849	67	Male	Non-Small Cell Lung Cancer	PD-1/PDL-1	9.84	2	1
P-0011378	68	Male	Non-Small Cell Lung Cancer	PD-1/PDL-1	8.85	2	1
P-0001296	70	Female	Non-Small Cell Lung Cancer	PD-1/PDL-1	3.35	2	1
P-0001365	70	Male	Non-Small Cell Lung Cancer	PD-1/PDL-1	5.58	2	1
P-0000363	71	Male	Non-Small Cell Lung Cancer	PD-1/PDL-1	13.38	2	1
P-0007051	71	Male	Non-Small Cell Lung Cancer	PD-1/PDL-1	13.77	2	1
P-0012931	72	Male	Non-Small Cell Lung Cancer	PD-1/PDL-1	9.84	2	0
P-0007514	73	Female	Non-Small Cell Lung Cancer	PD-1/PDL-1	3.94	2	1
P-0004693	74	Female	Non-Small Cell Lung Cancer	PD-1/PDL-1	9.84	2	1
P-0011192	74	Female	Non-Small Cell Lung Cancer	PD-1/PDL-1	10.82	2	0
P-0001199	76	Female	Non-Small Cell Lung Cancer	PD-1/PDL-1	14.5	2	1
P-0005456	77	Male	Non-Small Cell Lung Cancer	PD-1/PDL-1	5.9	2	1
P-0005252	79	Female	Non-Small Cell Lung Cancer	PD-1/PDL-1	12.79	2	1
P-0009638	82	Male	Non-Small Cell Lung Cancer	PD-1/PDL-1	17.71	2	1
P-0016290	83	Female	Non-Small Cell Lung Cancer	PD-1/PDL-1	7.9	2	1
P-0000702	85	Female	Non-Small Cell Lung Cancer	PD-1/PDL-1	6.69	2	0
P-0005731	55	Male	Bladder Cancer	PD-1/PDL-1	24.5947	1	1
P-0003507	57	Male	Bladder Cancer	PD-1/PDL-1	4.91895	1	1
P-0026723	58	Male	Bladder Cancer	PD-1/PDL-1	7.89943	1	0
P-0018216	62	Male	Bladder Cancer	PD-1/PDL-1	8.77715	1	0
P-0002404	72	Male	Bladder Cancer	PD-1/PDL-1	3.34573	1	1
P-0001904	72	Female	Bladder Cancer	PD-1/PDL-1	6.69146	1	1
P-0024827	74	Male	Bladder Cancer	PD-1/PDL-1	7.89943	1	0
P-0005150	75	Male	Bladder Cancer	PD-1/PDL-1	0.983789	1	0
P-0009846	77	Male	Bladder Cancer	PD-1/PDL-1	12.7893	1	1
P-0026160	80	Male	Bladder Cancer	PD-1/PDL-1	2.63314	1	0
P-0009898	85	Male	Bladder Cancer	PD-1/PDL-1	8.8541	1	1
P-0018277	27	Male	Colorectal Cancer	Combo	8.77715	1	0
P-0019475	47	Male	Colorectal Cancer	PD-1/PDL-1	93.0378	1	1
P-0007997	59	Female	Colorectal Cancer	PD-1/PDL-1	52.1408	1	1
P-0005635	46	Female	Glioma	PD-1/PDL-1	5.9	1	0
P-0002836	55	Female	Glioma	PD-1/PDL-1	5.58	1	1
P-0004416	45	Male	Head and Neck Cancer	PD-1/PDL-1	1.96758	1	1
P-0003374	55	Male	Head and Neck Cancer	PD-1/PDL-1	1.96758	1	1
P-0025373	61	Male	Head and Neck Cancer	PD-1/PDL-1	12.288	1	0
P-0010082	77	Male	Head and Neck Cancer	PD-1/PDL-1	3.93516	1	1
P-0005583	25	Female	Melanoma	Combo	6.89	1	1
P-0008912	28	Female	Melanoma	Combo	15.74	1	1
P-0005304	47	Female	Melanoma	Combo	1.97	1	1
P-0008375	54	Female	Melanoma	Combo	9.84	1	1
P-0006339	64	Female	Melanoma	PD-1/PDL-1	64.93	1	0
P-0007918	71	Male	Melanoma	Combo	56.08	1	1
P-0002456	74	Female	Melanoma	CTLA4	7.81	1	1
P-0005039	78	Female	Melanoma	Combo	29.51	1	1
P-0003359	82	Male	Melanoma	PD-1/PDL-1	2.95	1	1
P-0013826	90	Male	Melanoma	PD-1/PDL-1	163.31	1	0
P-0002738	32	Female	Non-Small Cell Lung Cancer	PD-1/PDL-1	7.81	1	1
P-0001314	44	Female	Non-Small Cell Lung Cancer	PD-1/PDL-1	2.23	1	1
P-0003913	44	Female	Non-Small Cell Lung Cancer	PD-1/PDL-1	3.35	1	1
P-0005553	49	Male	Non-Small Cell Lung Cancer	PD-1/PDL-1	4.92	1	1
P-0001633	55	Female	Non-Small Cell Lung Cancer	PD-1/PDL-1	4.46	1	1
P-0005579	56	Female	Non-Small Cell Lung Cancer	PD-1/PDL-1	1.97	1	1
P-0008874	58	Male	Non-Small Cell Lung Cancer	PD-1/PDL-1	10.82	1	1
P-0014328	61	Female	Non-Small Cell Lung Cancer	Combo	4.39	1	1
P-0011508	62	Male	Non-Small Cell Lung Cancer	PD-1/PDL-1	6.89	1	1
P-0014736	63	Male	Non-Small Cell Lung Cancer	PD-1/PDL-1	5.27	1	1
P-0011453	66	Male	Non-Small Cell Lung Cancer	PD-1/PDL-1	5.9	1	1
P-0008922	67	Male	Non-Small Cell Lung Cancer	PD-1/PDL-1	2.95	1	1
P-0000165	67	Female	Non-Small Cell Lung Cancer	PD-1/PDL-1	5.58	1	1
P-0009370	67	Female	Non-Small Cell Lung Cancer	PD-1/PDL-1	8.85	1	0
P-0010355	69	Female	Non-Small Cell Lung Cancer	PD-1/PDL-1	6.89	1	1
P-0009379	69	Male	Non-Small Cell Lung Cancer	PD-1/PDL-1	8.85	1	1
P-0011030	70	Male	Non-Small Cell Lung Cancer	PD-1/PDL-1	0.98	1	1
P-0006516	73	Male	Non-Small Cell Lung Cancer	PD-1/PDL-1	1.97	1	1
P-0015177	73	Male	Non-Small Cell Lung Cancer	PD-1/PDL-1	8.78	1	1
P-0009431	74	Female	Non-Small Cell Lung Cancer	PD-1/PDL-1	8.85	1	1
P-0007114	77	Male	Non-Small Cell Lung Cancer	PD-1/PDL-1	8.85	1	1
P-0016175	77	Female	Non-Small Cell Lung Cancer	PD-1/PDL-1	14.92	1	1
P-0007619	78	Male	Non-Small Cell Lung Cancer	PD-1/PDL-1	9.84	1	1
P-0007099	78	Female	Non-Small Cell Lung Cancer	PD-1/PDL-1	10.82	1	1
P-0016542	80	Male	Non-Small Cell Lung Cancer	PD-1/PDL-1	19.31	1	1
P-0004315	86	Female	Non-Small Cell Lung Cancer	PD-1/PDL-1	8.85	1	1
P-0016875	89	Female	Non-Small Cell Lung Cancer	PD-1/PDL-1	5.27	1	0
P-0008061	68	Male	Renal Cell Carcinoma	PD-1/PDL-1	8.85	1	1
P-0014600	73	Male	Renal Cell Carcinoma	PD-1/PDL-1	5.27	1	1
P-0006220	90	Male	Renal Cell Carcinoma	PD-1/PDL-1	1.97	1	1
P-0011524	60	Female	Bladder Cancer	PD-1/PDL-1	16.7244	0	1
P-0000880	66	Female	Bladder Cancer	PD-1/PDL-1	8.92195	0	1
P-0003841	77	Male	Bladder Cancer	PD-1/PDL-1	12.7893	0	0
P-0008382	35	Male	Glioma	PD-1/PDL-1	8.85	0	1
P-0015369	63	Male	Glioma	PD-1/PDL-1	1.76	0	0
P-0001621	37	Female	Head and Neck Cancer	Combo	3.34573	0	1
P-0007561	36	Female	Melanoma	Combo	33.45	0	1
P-0010975	62	Female	Melanoma	PD-1/PDL-1	4.92	0	1
P-0002157	81	Female	Melanoma	PD-1/PDL-1	23.42	0	0
P-0002890	40	Female	Non-Small Cell Lung Cancer	PD-1/PDL-1	6.69	0	1
P-0010257	55	Female	Non-Small Cell Lung Cancer	PD-1/PDL-1	9.84	0	1
P-0003278	55	Female	Non-Small Cell Lung Cancer	PD-1/PDL-1	13.77	0	1
P-0013063	57	Male	Non-Small Cell Lung Cancer	PD-1/PDL-1	10.82	0	1
P-0009434	58	Male	Non-Small Cell Lung Cancer	PD-1/PDL-1	4.92	0	0
P-0004613	61	Female	Non-Small Cell Lung Cancer	PD-1/PDL-1	3.94	0	0
P-0015222	62	Male	Non-Small Cell Lung Cancer	PD-1/PDL-1	7.9	0	1
P-0008438	63	Male	Non-Small Cell Lung Cancer	PD-1/PDL-1	2.95	0	0
P-0006321	64	Male	Non-Small Cell Lung Cancer	PD-1/PDL-1	2.95	0	1
P-0003972	65	Male	Non-Small Cell Lung Cancer	PD-1/PDL-1	5.9	0	1
P-0004395	65	Female	Non-Small Cell Lung Cancer	PD-1/PDL-1	7.87	0	1
P-0000867	66	Male	Non-Small Cell Lung Cancer	PD-1/PDL-1	6.69	0	1
P-0003811	68	Female	Non-Small Cell Lung Cancer	PD-1/PDL-1	16.72	0	1
P-0010385	72	Male	Non-Small Cell Lung Cancer	PD-1/PDL-1	7.87	0	1
P-0001738	24	Male	Renal Cell Carcinoma	PD-1/PDL-1	1.12	0	1
